1 **Haploinsufficiency of the essential gene RpS12 causes defects in erythropoiesis and**  
2 **hematopoietic stem cell maintenance**

3 Virginia Folgado-Marco\* (1), Kristina Ames\* (2,3), Jacky Chuen (1), Kira Gritsman (2,3) &  
4 Nicholas E. Baker (1)

5 (1) Department of Genetics, Albert Einstein College of Medicine

6 (2) Department of Medicine, Albert Einstein College of Medicine

7 (3) Department of Cell Biology, Albert Einstein College of Medicine

8 \* These authors contributed equally

9

10

11

12

13

14

15

16

17

18

19

20

21

22 Corresponding authors:

23 Nicholas E. Baker: [nicholas.baker@einsteinmed.org](mailto:nicholas.baker@einsteinmed.org)

24 Kira Gritsman: [kira.gritsman@einsteinmed.org](mailto:kira.gritsman@einsteinmed.org)

25

## 26 **Abstract**

27 Ribosomal protein (Rp) gene haploinsufficiency can result in Diamond-Blackfan Anemia (DBA),  
28 characterized by defective erythropoiesis and skeletal defects. Some mouse Rp mutations  
29 recapitulate DBA phenotypes, although others lack erythropoietic or skeletal defects. We  
30 generated a conditional knockout mouse to partially delete *RpS12*, which results in homozygous  
31 embryonic lethality. *Rps12<sup>+/-</sup>* mice have growth and morphological defects, pancytopenia and  
32 impaired erythropoiesis. A striking reduction in hematopoietic stem cells (HSCs) and progenitors  
33 in the bone marrow (BM) was associated with decreased ability to repopulate the blood system  
34 after competitive and non-competitive BM transplantation. The mutants exhibited loss of HSC  
35 quiescence, which was associated with ERK and MTOR activation and increased global  
36 translation in HSC and progenitors. Thus, RpS12 has a very strong requirement in maintaining  
37 HSC quiescence and function, in addition to erythropoiesis that is affected in DBA patients.

38

## 39 **Introduction**

40 In the cell, protein synthesis is one of the most energetically expensive processes, and  
41 both the specificity and overall level of translation are tightly regulated. The ribosome is  
42 the macromolecular machine tasked with translating mRNAs into proteins and, as such,  
43 plays an essential role in the physiology of the cell. Ribosomes are evolutionarily  
44 conserved ribonucleoprotein complexes composed of ribosomal RNA (rRNA) and  
45 ribosomal proteins (Rp) (Yonath and Franceschi 1998; Wilson and Doudna Cate 2012).  
46 They catalyze protein synthesis in all cell types, providing a supply line of steady-state  
47 levels of necessary cellular proteins (Wilson and Doudna Cate 2012). The functional  
48 components of the ribosome are highly conserved, and in higher eukaryotes consist of a  
49 small subunit (40S) and a large subunit (60S). These ribosomal subunits contain a total

50 of 79 ribosomal proteins in eukaryotes, including 34 ribosomal proteins that are also  
51 conserved in prokaryotes (Petibon et al. 2020). In most cell types, ribosomal protein  
52 genes are among the most highly expressed genes (Geiger et al. 2012; Ji et al. 2019).  
53 Most ribosomal proteins are essential for ribosome biogenesis and function, which makes  
54 them essential for cell growth and proliferation (de la Cruz et al. 2015).

55         Given the importance of ribosomes, mutations in components of the ribosome or  
56 the ribosome biogenesis pathway in humans result in a group of diseases known as  
57 ribosomopathies. Despite the essential role of the ribosome in all cell types, this group of  
58 diseases is characterized by the presence of defects in specific tissues. Heterozygous  
59 loss of function mutations in *Rp* genes lead to Diamond-Blackfan Anemia (DBA), a  
60 congenital bone marrow failure syndrome characterized by macrocytic anemia, skeletal  
61 defects, and increased cancer risk. In DBA patients, mutations have been identified in 21  
62 out of the 79 existing *Rp* genes, along with the GATA1 transcription factor (Ulirsch et al.  
63 2018). Strikingly, in approximately 30-40% of DBA patient cases a mutation has not yet  
64 been identified. The fact that only a subset of all *Rp* genes have been found altered in  
65 DBA patients poses the question of whether mutations in any *Rp* gene can result in DBA  
66 and, if not, what would be the consequences for mutations in those *Rp* genes.

67         The generation and characterization of mice with mutations in *Rp* genes in recent  
68 years has begun to shed light on this question. Mutations in *Rp* genes of both the large  
69 and the small ribosomal subunits have been found to have similar phenotypes to those  
70 of DBA patients, such as impaired erythropoiesis, skeletal defects, and increased  
71 incidence of cancer, including some *Rp* not yet implicated in DBA (Oliver et al. 2004;  
72 McGowan et al. 2008; Jaako et al. 2011; Terzian et al. 2011; Morgado-Palacin et al. 2015;

73 Schneider et al. 2016). However, erythropoietic defects are not always reported for  
74 mutants in *Rp* genes, including some that are implicated in human DBA (Matsson et al.  
75 2004; Watkins-Chow et al. 2013; Kazerounian et al. 2016). In addition, a variety of other  
76 defects are reported in particular genotypes, ranging from embryonic lethality to brain  
77 defects, pigmentation defects, and defects in other aspects of hematopoiesis (McGowan  
78 et al. 2008; Kondrashov et al. 2011; Terzian et al. 2011; Watkins-Chow et al. 2013;  
79 Morgado-Palacin et al. 2015).

80 The *RpS12* gene, which is not yet implicated in DBA, reportedly has special  
81 functions in *Drosophila* that differ from those of most *Rp*. Heterozygous loss of 66 out of  
82 the 79 *Drosophila Rp* genes result in a 'Minute' phenotype, named for its small adult  
83 sensory bristles and also characterized by delayed development (Marygold et al. 2007).  
84 Additionally, 'Minute' *Rp*<sup>+/-</sup> cells are eliminated by wild-type (WT) neighboring cells when  
85 they are found together in developing tissues, by a process known as cell competition  
86 (Morata and Ripoll 1975; Clavería and Torres 2016; Baker 2020). Remarkably, delayed  
87 development, reduced translation, cell competition and other aspects of the 'Minute'  
88 phenotype depend on the *RpS12* protein, which seems to be required for haploinsufficient  
89 effects of other *Rp* genes, suggesting that *RpS12* acts as a sensor or reporter of deficits  
90 in other *Rp*. Accordingly, increasing the copy number of *RpS12* enhances these 'Minute'  
91 phenotypes caused by mutations in other *Rp* genes, whereas reducing the *RpS12* gene  
92 copy number suppresses them (Kale et al. 2018; Boulan et al. 2019; Ji et al. 2019).  
93 Interestingly, *RpS12* is one of the few *Rp* genes whose null mutation does not present a  
94 'Minute' phenotype in heterozygosis (Marygold et al. 2007; Kale et al. 2018). In mammals,  
95 it has been shown that *RpS12* deletions are frequent in diffuse large B cell lymphoma

96 samples, and that RpS12 distribution in the ribosomes was altered under hypoxic  
97 conditions in the human embryonic kidney cell line, HEK293, resulting in changes of their  
98 translome (Derenzini et al. 2019; Brumwell et al. 2020). Human RpS12 has also  
99 emerged as a candidate regulator of Wnt secretion in cancer cells (Katanaev et al. 2020).  
100 However, the phenotype of *RpS12* deletion in mammals has not been determined.

101 Protein synthesis regulation is important in stem cells. To maintain proper  
102 homeostasis, hematopoietic stem cells (HSCs) sustain the balance between a quiescent  
103 and an actively dividing state (Cabezas-Wallscheid et al. 2017). Quiescent HSCs require  
104 low rates of protein synthesis, and even HSCs exiting quiescence still exhibit significantly  
105 lower translation rates than in more differentiated progenitors. Both increases and  
106 decreases in protein synthesis levels can impair HSC function (Signer et al. 2014; Hidalgo  
107 San Jose et al. 2020).

108 The AKT/MTORC1 signaling pathway is one of the most well-known signaling  
109 pathways that regulates translation, in part through the expression of ribosomal proteins  
110 and translation factors (Fonseca et al. 2014). Hyperactivation of AKT signaling pathway  
111 is deleterious for normal HSC function, and results in increased HSC cycling, with  
112 depletion of the stem cell pool (Yilmaz et al. 2006; Kharas et al. 2010; Lee et al. 2010;  
113 Magee et al. 2012). Activation of AKT by stem cell factor (SCF) and other growth factors  
114 leads to the activation of MTOR, which results in the phosphorylation of the ribosomal  
115 protein S6 kinase 1 (S6K1) and the protein initiation factor 4E binding protein1 (4EBP1)  
116 (Gentilella et al. 2015). Phosphorylation of S6 by S6K1 at Serine 235/Ser236 is  
117 associated with increased protein translation (Krieg et al. 1988; Roux and Topisirovic  
118 2018). Additionally, phosphorylation of 4E-BP1 by MTOR at the Thr37 and Thr46 residues

119 primes it for dissociation of 4E-BP1 from eIF4E, also activating translation (Schalm et al.  
120 2003). Furthermore, another important pathway regulating growth and translation, the  
121 MEK/ERK pathway, has been shown to phosphorylate S6 at Serine 235/Ser236  
122 promoting the translation preinitiation complex in mammalian cells (Roux et al. 2007).

123 To further explore the specific functions of Rp genes, their potential involvement in  
124 DBA, and the regulation of translation, we determined the phenotype of RpS12 deletion  
125 in mice. We generated a conditional knock-out mouse, *RpS12<sup>flox/flox</sup>*, which, when crossed  
126 to embryonically expressed E1a-Cre recombinase, allowed us to generate homozygous  
127 (*RpS12<sup>-/-</sup>*) and heterozygous knock-out mice (*RpS12<sup>+/-</sup>*). We report that, while  
128 homozygous loss of *RpS12* is lethal at early stages of embryogenesis, the *RpS12<sup>+/-</sup>*  
129 phenotype includes reduced body size, skeletal defects, and, in some cases,  
130 hydrocephalus and stroke. Similar to DBA patients, and some other previously published  
131 Rp mouse mutants, *RpS12<sup>+/-</sup>* mice present a block in erythroid maturation, lower red cell  
132 counts, and decreased spleen size. However, loss of RpS12 also leads to a striking  
133 reduction in the number of hematopoietic stem cells in the bone marrow, as well as  
134 significantly altered progenitor populations, leading to overall reduced bone marrow  
135 cellularity and a decreased ability of *RpS12<sup>+/-</sup>* BM cells to repopulate the blood system,  
136 uncovering an impairment in HSC and progenitor function. These phenotypes were  
137 associated with increased translation and loss of quiescence in HSCs.

138

## 139 **Results**

140 **RpS12 haploinsufficiency results in a pleiotropic phenotype, including delayed**  
141 **growth and increased mortality**

142 To test the role of the RpS12 protein in a mammal, we used CRISPR gene editing to  
143 generate a mouse line with *LoxP* sites flanking exons 2 and 3 of the endogenous *RpS12*  
144 *locus* (*RpS12<sup>flox</sup>*) (Supp Fig.1). Excision of these 2 exons generates an allele that cannot  
145 produce functional RpS12 protein, since exon 2 contains the ATG translation initiation  
146 codon. We chose not to eliminate the entire *RpS12* locus, to avoid deleting the small  
147 nucleolar RNA genes Snord100 and Snora33, which are located in introns 4 and 5,  
148 respectively (Supp Fig. 1). We crossed *RpS12<sup>flox/flox</sup>* mice to a line that expresses the Cre  
149 recombinase embryonically (*Ella-Cre*) to obtain RpS12 heterozygous knock-out (KO)  
150 mice (*RpS12<sup>KO/+</sup>*) (Fig. 1A). Unlike heterozygous null flies, which don't have any  
151 observable phenotype (Marygold et al. 2007; Kale et al. 2018), *RpS12<sup>KO/+</sup>* mice have  
152 reduced growth rates post-partum in comparison to their wild-type littermates (Fig. 1B,  
153 C). Additional phenotypes include kinked tails, mild hyperpigmentation of the footpads,  
154 and an increased risk of hydrocephalus (Fig. 1D, E, F). Although hydrocephalus has not  
155 been reported previously, some of these phenotypes have also been found in other  
156 ribosomal protein (Rp) mutant mouse models (Oliver et al. 2004; McGowan et al. 2008;  
157 Terzian et al. 2011). Furthermore, *RpS12<sup>KO/+</sup>* mice have increased mortality, especially in  
158 early post-natal stages, most of which is associated with hydrocephalus or the inability to  
159 gain weight (Fig. 1G).

160 To investigate if the KO allele of *RpS12* is lethal in the homozygous state, and  
161 whether *RpS12<sup>KO/+</sup>* animals have reduced growth during embryonic development, we  
162 crossed heterozygous *RpS12<sup>KO/+</sup>* male and female mice and analyzed the resulting  
163 embryos at stage E13.5 (we could not assess frequencies in pups at birth because  
164 *RpS12<sup>KO/+</sup>* females invariably died during labor). There were no *RpS12<sup>KO/KO</sup>* specimens

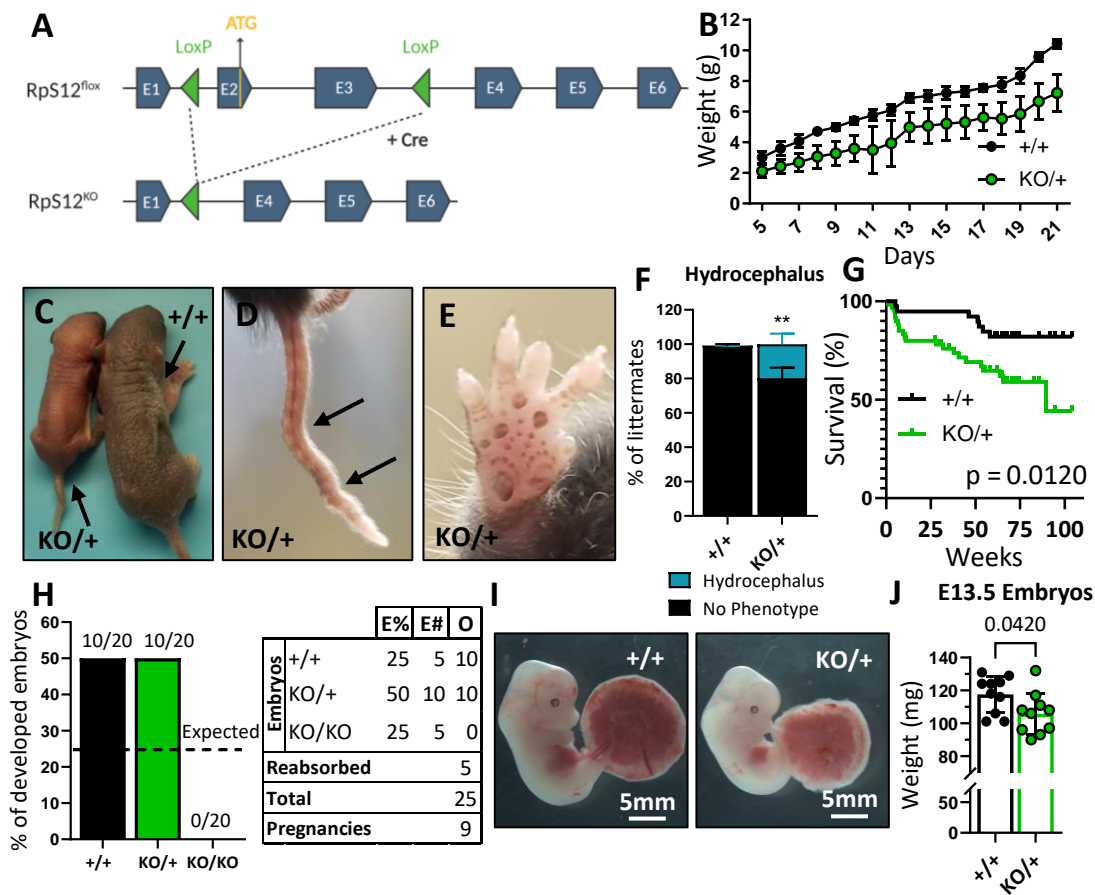

**Figure 1. Loss of one copy of *RpS12* results in delayed growth, morphologic defects, and reduced viability.**

**(A)** Conditional *RpS12<sup>lox</sup>* transgenic knock-in has two loxP sites flanking exons 2 and 3, that are removed by Cre recombinase activity to generate *RpS12<sup>KO</sup>*. **(B)** Post-natal growth curve of *RpS12<sup>KO/+</sup>* and *RpS12<sup>+/+</sup>* littermates (+/+ n=8 and KO/+ n=11 pups). **(C)** Picture of 5-day-old *RpS12<sup>KO/+</sup>* and *RpS12<sup>+/+</sup>* littermates. **(D)** Representative picture of “kinked” tail in *RpS12<sup>KO/+</sup>* mouse. **(E)** Representative picture of the anterior footpad hyperpigmentation in *RpS12<sup>KO/+</sup>*. **(F)** Quantification of the percentage of mice presenting hydrocephalus per litter (n=27 litters, 2-way ANOVA p=0.0035). **(G)** Kaplan-Meier survival curves of *RpS12<sup>KO/+</sup>* and *RpS12<sup>+/+</sup>* littermates starting at day 5 of age (+/+ n=39 and KO/+ n=60, log-rank Mantel-Cox test p=0.012). **(H)** Embryo genotype segregation from crosses between *RpS12<sup>KO/+</sup>* male and female. Graph represents percentage of developed embryos and the table shows the total numbers (E%=expected percentages, E#=expected numbers, O=observed numbers). **(I)** Representative pictures of E13.5 embryos with their placentas. **(J)** E13.5 embryo weights (n=10 on each genotype, unpaired t-test p=0.0420).



165 among the embryos obtained (Fig. 1H), which led us to conclude that this genotype must  
166 be lethal prior to stage E13.5. Furthermore, *RpS12*<sup>KO/+</sup> embryos are smaller in size  
167 compared to their wildtype counterparts (Fig. 1I, J). Therefore, these results indicate that  
168 *RpS12* is an essential gene, whose homozygous loss leads to early embryonic lethality,  
169 and heterozygous loss causes reduced growth starting in embryogenesis, in addition to  
170 other defects recognized post-partum.

171

### 172 **Heterozygous loss of *RpS12* results in erythropoiesis defects that worsen with age**

173 We sought to understand if, similar to other *Rp* mutant mouse models, *RpS12*  
174 heterozygous mutants have anemia or defective erythropoiesis. Analysis of peripheral  
175 blood counts showed that “young” (6-8 weeks old) *RpS12*<sup>KO/+</sup> mice had lower number of  
176 white blood cells (WBC), red blood cells (RBC), and platelets, a condition known as  
177 pancytopenia (Fig. 2A). We also observed a high mean corpuscular volume (MCV), which  
178 is reminiscent of the macrocytic anemia seen in DBA patients.

179 To analyze erythropoiesis in *RpS12*<sup>KO/+</sup> mice, we used flow cytometry with the  
180 lineage markers Ter119 and CD71 on bone marrow and spleen cells (Fig. 2B). These  
181 populations represent different maturation stages of the red blood cell production process,  
182 which we refer to as RI (CD71<sup>+</sup>, Ter119<sup>-</sup>, proerythroblasts), RII (CD71<sup>+</sup>Ter119<sup>+</sup>, basophilic  
183 erythroblasts), RIII (CD71<sup>mid</sup>, Ter119<sup>+</sup>, late basophilic and polychromatophilic  
184 erythroblasts), and RIV (CD71<sup>-</sup>Ter119<sup>+</sup>, orthochromatic erythroblasts) (Socolovsky et al.  
185 2001). Bone marrow samples from young *RpS12*<sup>KO/+</sup> mice showed a defective transition  
186 between the RII and RIII stage cells, while the erythropoiesis in spleen populations was  
187 unchanged (Fig. 2C, D). This impairment in erythropoiesis worsened with age, as

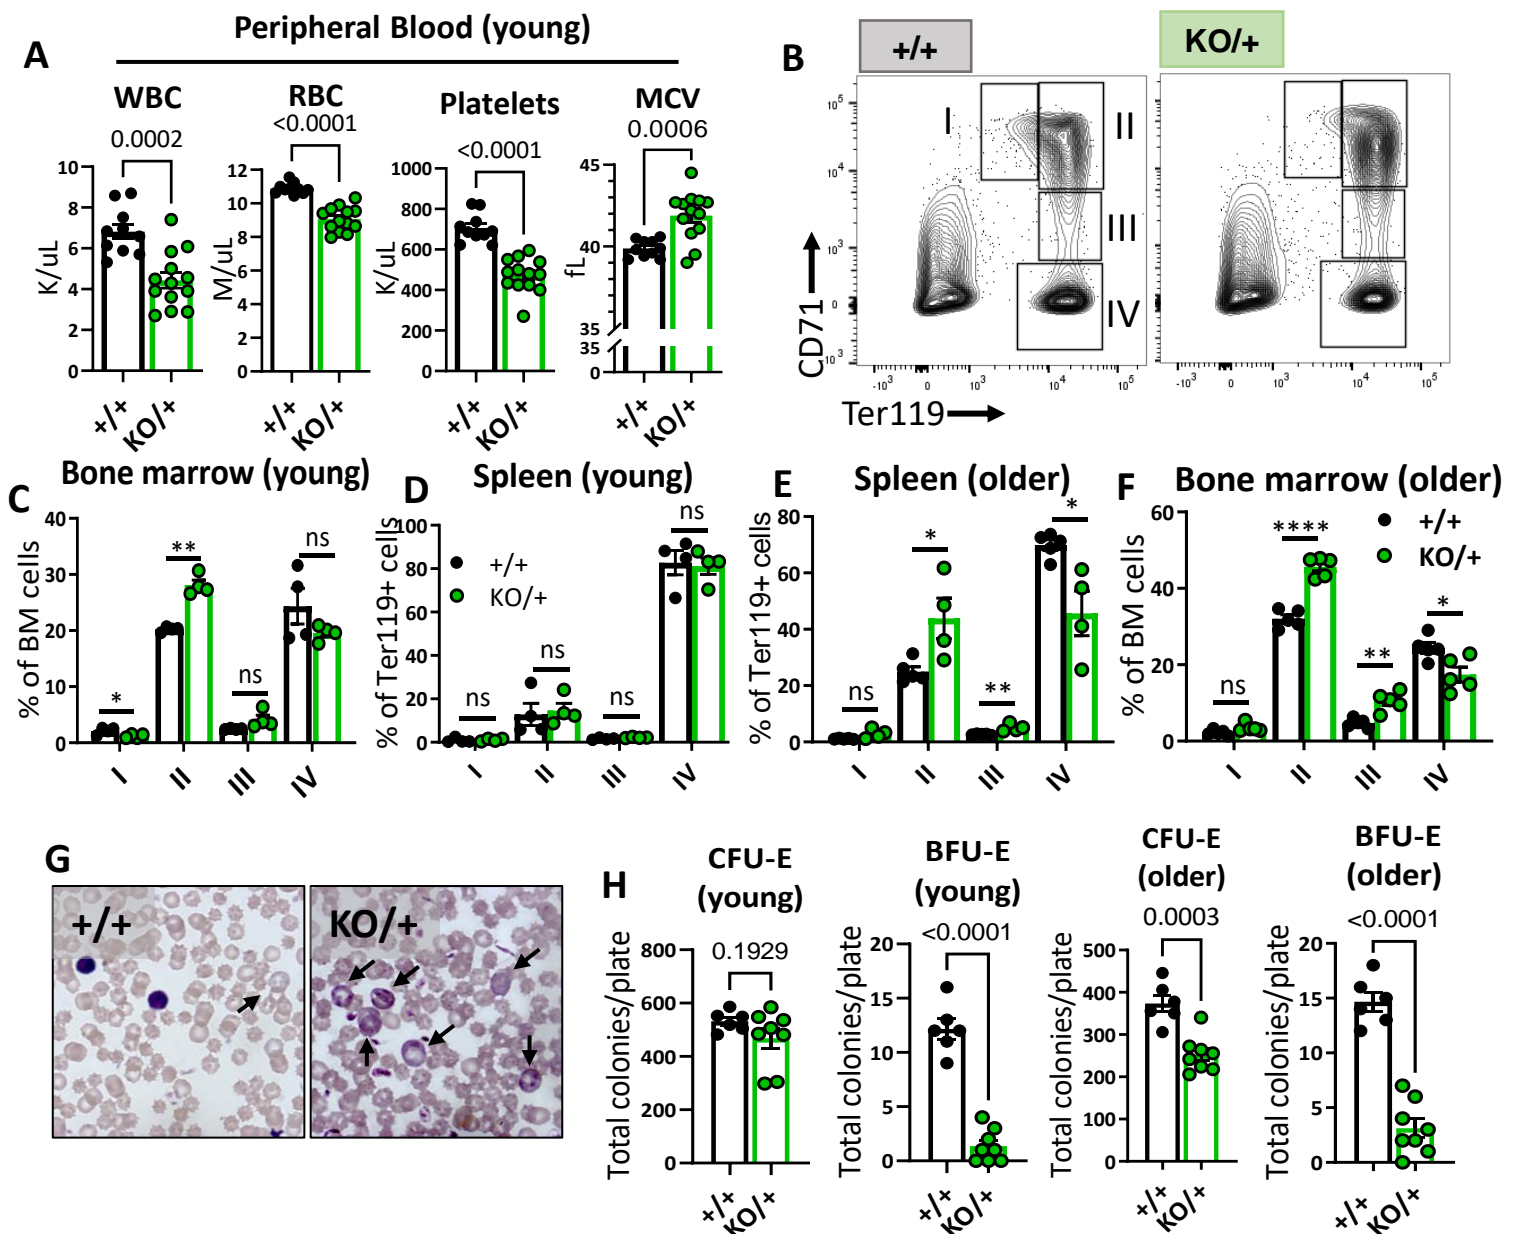

**Figure 2. Haploinsufficiency of *RpS12* results in erythropoiesis defects that worsen with age.**

**(A)** Quantification of peripheral blood counts from young (6-8 weeks) littermates ( $+/+$   $n=10$  and  $KO/+$   $n=13$ ) (WBC=white blood cells, RBC=red blood cell, MCV=mean corpuscular volume). **(B)** Representative flow cytometry gating of bone marrow cells from 6-8-weeks-old mice of erythropoietic populations using Ter119 and CD71 markers. **(C, D, E, F)** Frequencies of erythroid progenitors in bone marrow and spleen of young (6-7 weeks old,  $+/+$   $n=4$  and  $KO/+$   $n=4$ ) and older (6-7 months old,  $+/+$   $n=5$  and  $KO/+$   $n=5$ ) mice. **(G)** Representative images of stained peripheral blood smears indicating the presence of reticulocytes (arrows). **(H)** Total number of CFU-E and BFU-E colonies per plate ( $5 \times 10^5$  BM cells plated) in methylcellulose media supplemented with EPO (M3434) from young mice (6-7 weeks old,  $+/+$   $n=4$  and  $KO/+$   $n=4$ , each biological sample had two replicates) and older mice (6-7 months old,  $+/+$   $n=4$  and  $KO/+$   $n=4$ , each biological sample had two replicates).

Statistical analysis: quantifications represent mean  $\pm$  SEM, when only two groups were being compared, unpaired t-test was performed, and for multiple comparison one-way ANOVA analysis was used. \* $p < 0.05$ , \*\* $p < 0.01$ , \*\*\* $p < 0.001$ , \*\*\*\* $p < 0.0001$

188 samples from “older” (6-7 month-old) *RpS12<sup>KO/+</sup>* mice had a higher accumulation of RII  
189 and RIII stage cells, while RIV population numbers were decreased in both spleen and  
190 bone marrow samples at this age (Fig. 2E, F). In agreement with defective erythropoiesis,  
191 peripheral blood samples showed a visibly elevated percentage of reticulocytes in Wright-  
192 Giemsa stained blood smears (Fig. 2G). To assess erythropoietic progenitor function, we  
193 performed colony-forming unit (CFU) assays in methylcellulose media optimized for the  
194 differentiation of erythroid progenitors. Consistent with the observed impairment of  
195 erythropoiesis, *RpS12<sup>KO/+</sup>* bone marrow cells generated fewer BFU-E colonies, indicating  
196 reduced erythroid progenitor function (Fig. 2H). Altogether, these results show that *RpS12*  
197 is required for erythroid differentiation, and demonstrate a role for *Rps12* in  
198 erythropoiesis, similar to what has been observed in mouse models of DBA genes like  
199 *RpL11* or *RpS19* (Jaako et al. 2011; Morgado-Palacin et al. 2015).

200

201 ***RpS12<sup>KO/+</sup>* mice have a striking reduction in hematopoietic progenitor populations,**  
202 **resulting in chronic pancytopenia**

203 We were intrigued by the fact that *RpS12<sup>KO/+</sup>* mice have pancytopenia (Fig. 2A),  
204 since this is not a common feature of DBA patients. Due to the general decrease of  
205 peripheral blood cell numbers in *RpS12<sup>KO/+</sup>* mice, we hypothesized that hematopoietic  
206 stem and progenitor cells (HSPCs) might be affected. Using flow cytometry analysis, we  
207 assessed the stem cell and progenitor populations in the bone marrow using previously  
208 defined markers (Pietras et al. 2015) (Fig. 3A). Indeed, compared to the controls,  
209 *RpS12<sup>KO/+</sup>* revealed a striking reduction in the numbers of long-term HSCs (LT-HSCs:  
210 Flk2<sup>-</sup>CD48<sup>-</sup>CD150<sup>+</sup> Lineage<sup>-</sup>Sca1<sup>+</sup>c-kit<sup>+</sup> (LSK)) and short-term HSCs (ST-HSCs: Flk2<sup>-</sup>

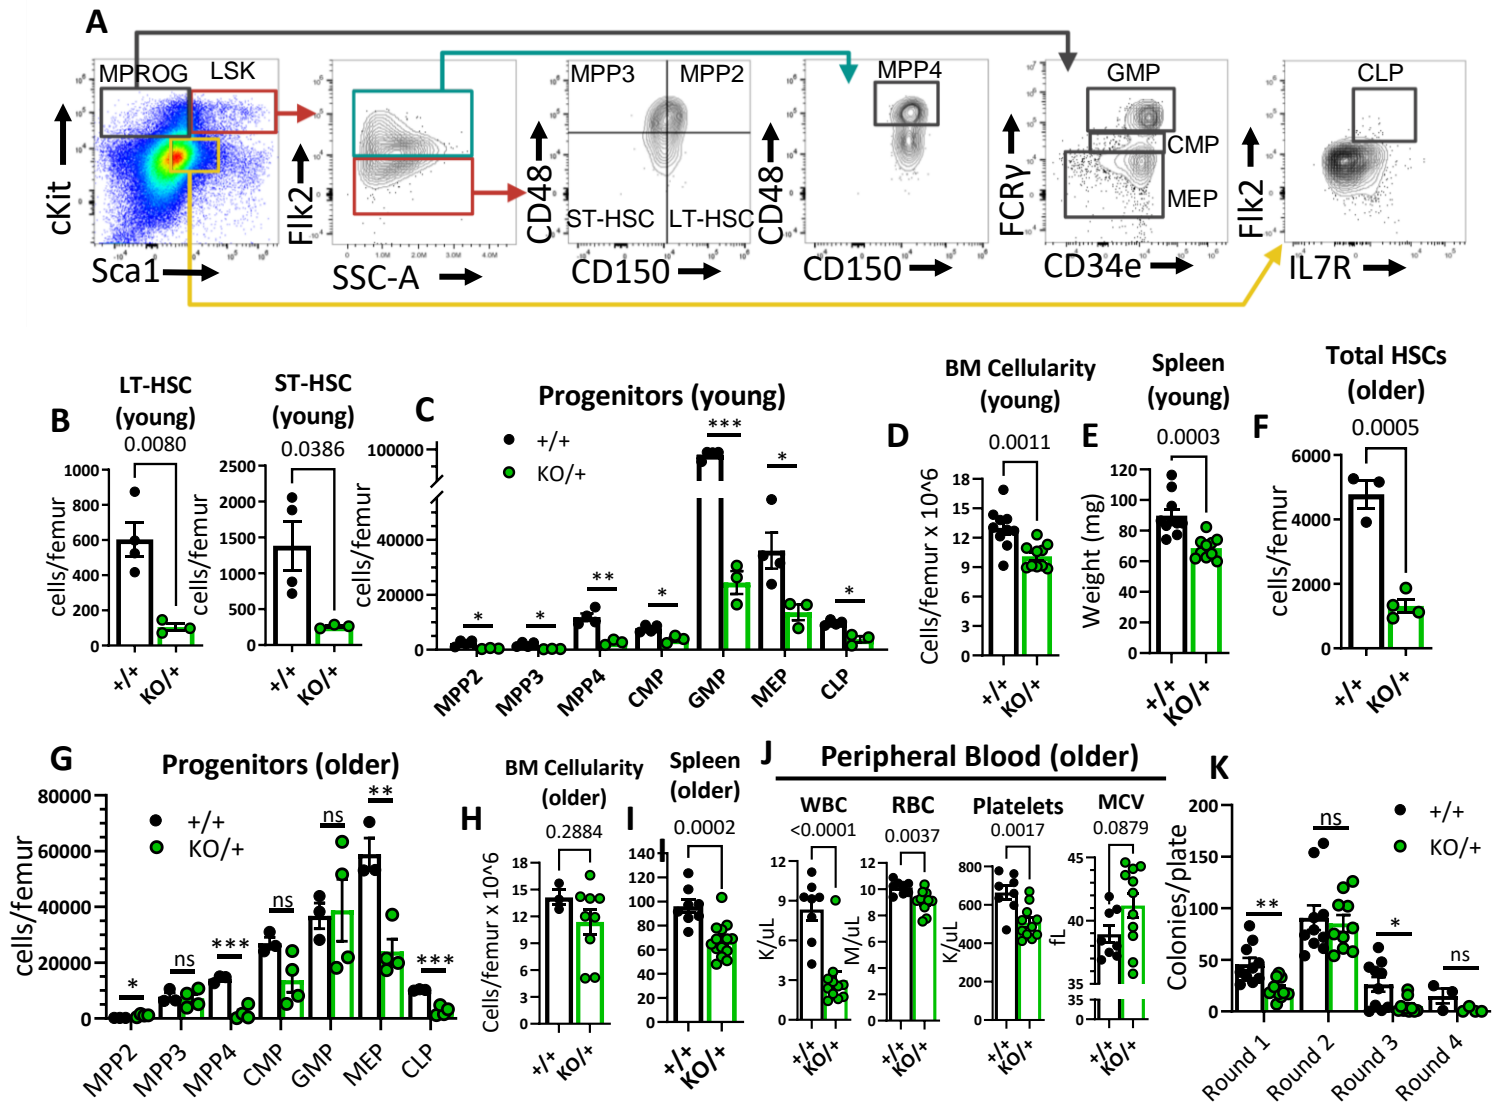

**Figure 3. Reduced HSCs and other hematopoietic progenitor numbers in *RpS12*<sup>KO/+</sup> mice.**

**(A)** Representative gating strategy used to identify bone marrow populations of LSKs: long-term HSC (LT- HSC), short-term HSC (ST-HSC), multi-potent progenitors (MPP2, MPP3, MPP4) and myeloid progenitors (MPROG): common myeloid progenitor (CMP), granulocyte-monocyte progenitor (GMP), megakaryocyte-erythrocyte (MEP) and common lymphoid progenitor (CLP). **(B)** Total LT-HSCs and ST-HSCs per femur of young mice (6-8 weeks old littermates, +/+ n=4 and KO/+ n=3). **(C)** Total number of cells per femur of indicated hematopoietic progenitor populations in young mice (6-8 weeks old littermates, +/+ n=4 and KO/+ n=3). **(D)** Bone marrow cellularity represented as cells per femur  $\times 10^6$  from young mice (6-7 weeks old littermates, +/+ n=10 and KO/+ n=10). **(E)** Spleen weights of young (6-7 weeks old, +/+ n=10 and KO/+ n=10) mice. **(F)** Total HSCs per femur of older mice (6-7-month-old, +/+ n=3 and KO/+ n=4). **(G)** Total number of cells per femur of indicated hematopoietic progenitor populations in older mice (6-7-month-old, +/+ n=3 and KO+ n=4). **(H)** Bone marrow cellularity represented as cells per femur  $\times 10^6$  from older mice (older: 6-7 months old, +/+ n=3 and KO/+ n=9). **(I)** Spleen weights of older (6-7 months old, +/+ n=8 and KO/+ n=14) mice. **(J)** Quantification of peripheral blood counts from older mice (6-7 months old, +/+ n=8 and KO/+ n=11). **(K)** Total number of colonies per plate ( $1 \times 10^4$  BM cells from 6-7-month-old mice plated in round 1 and  $1 \times 10^4$  cells plated from previous plate on each re-plating round) on each round of re-plating in complete methylcellulose media (+/+ n=5 and KO/+ n=5, 2 replicates per biological sample).

Statistical analysis: quantifications represent mean  $\pm$  SEM, unpaired t-tests were performed to established significance among populations between genotypes \*p < 0.05, \*\*p < 0.01, \*\*\*p < 0.001, \*\*\*\*p < 0.0001

211 CD48<sup>-</sup>CD150<sup>-</sup> LSK) (Fig. 3B). In addition, in *RpS12*<sup>KO/+</sup> bone marrow, the numbers of all  
212 hematopoietic progenitor populations were significantly reduced (Fig. 3C). Accordingly,  
213 compared to the WT littermates, young (6-8-week-old) *RpS12*<sup>KO/+</sup> mice had lower bone  
214 marrow cellularity and decreased spleen weights (Fig. 3D, E). Additionally, older (6-7-  
215 month-old) *RpS12*<sup>KO/+</sup> mice also had lower HSC numbers (Fig. 3F). Interestingly, we  
216 observed a partial recovery of some of the HSPC populations with age, such as multi-  
217 potent progenitors (MPP) 2 and 3, and the granulocyte-macrophage progenitors (GMP),  
218 as well as normalized overall BM cellularity, but not of spleen size (Fig. 3G, H, I). This,  
219 however, did not lead to improved blood counts (Fig. 3J), indicating that HSPC function  
220 was not significantly improved with age. Lastly, since *RpS12* deletion resulted in  
221 decreased HSC and progenitor numbers, we assessed the self-renewal capacity of  
222 *RpS12*<sup>KO/+</sup> bone marrow cells. Plating assays in complete methylcellulose media showed  
223 a decreased clonogenic activity of *RpS12*<sup>KO/+</sup> bone marrow cells, as evidenced by the  
224 lower number of total colonies observed in the first round of plating (Fig. 3K). Additionally,  
225 *RpS12*<sup>KO/+</sup> cells have reduced serial replating capacity, suggesting decreased self-  
226 renewal capacity (Fig. 3K). Together, these results suggest that *RpS12* plays an essential  
227 role in HSC function, including self-renewal and differentiation.

228

229 **Heterozygous loss of *RpS12* impairs ability of HSCs to reconstitute peripheral**  
230 **blood.**

231 We assessed self-renewal and differentiation properties of *RpS12*<sup>KO/+</sup> bone  
232 marrow cells (CD45.2+) *in vivo* by transplanting bone marrow into lethally irradiated  
233 B6.SJL mice (CD45.1+) (Fig. 4A). Interestingly, compared to the *RpS12*<sup>Flox/Flox</sup> or

234 *RpS12<sup>Flox/+</sup>* controls, *RpS12<sup>KO/+</sup>* bone marrow recipients had decreased survival, with 5  
235 out of 20 transplanted mice dying within the first 8 weeks in the *RpS12<sup>KO/+</sup>* group vs 0 out  
236 of 20 dying in the control group (Fig. 4B). Whereas 100% of the control recipients were  
237 able to reconstitute the bone marrow in the long term (up to 20 weeks), only 55% of the  
238 *RpS12<sup>KO/+</sup>* recipients did so (Fig. 4C). Furthermore, longitudinal analysis of donor  
239 chimerism in the peripheral blood revealed that compared to the controls, surviving  
240 *RpS12<sup>KO/+</sup>* transplant recipients had significantly decreased donor chimerism  
241 (%CD45.2+) in the B and T cell lineages, and a trend toward decreased chimerism in the  
242 myeloid lineage (Fig. 4D-G). Together, this data suggests that bone marrow cells that  
243 lack RpS12 are deficient in hematopoietic repopulating capacity after lethal irradiation.

244 To assess *RpS12<sup>KO/+</sup>* bone marrow cell repopulation capacity under more stringent  
245 conditions, we performed competitive transplantation of control (*RpS12<sup>Flox/+</sup>*) or *RpS12<sup>KO/+</sup>*  
246 bone marrow (CD45.2+) mixed with competitor WT bone marrow from B6.SJL mice  
247 (CD45.1+) in a 1:1 ratio into lethally irradiated B6.SJL (CD45.1+) recipient mice. Post-  
248 transplantation we monitored donor chimerism in the peripheral blood over time and  
249 analyzed the bone marrow chimerism at 20 weeks post-transplantation (Fig. 4H).  
250 Compared to the controls, *RpS12<sup>KO/+</sup>* transplant recipients showed a striking decrease in  
251 the percentage of donor-derived bone marrow cells and of HSCs (Fig. 4 I, J),  
252 accompanied by significant and persistent reduction in peripheral blood total donor  
253 chimerism in both myeloid and lymphoid lineages (Fig. 4K-N). Together, these data  
254 suggest that RpS12 haploinsufficiency leads to perturbed HSC self-renewal, resulting in  
255 ineffective hematopoiesis.

256

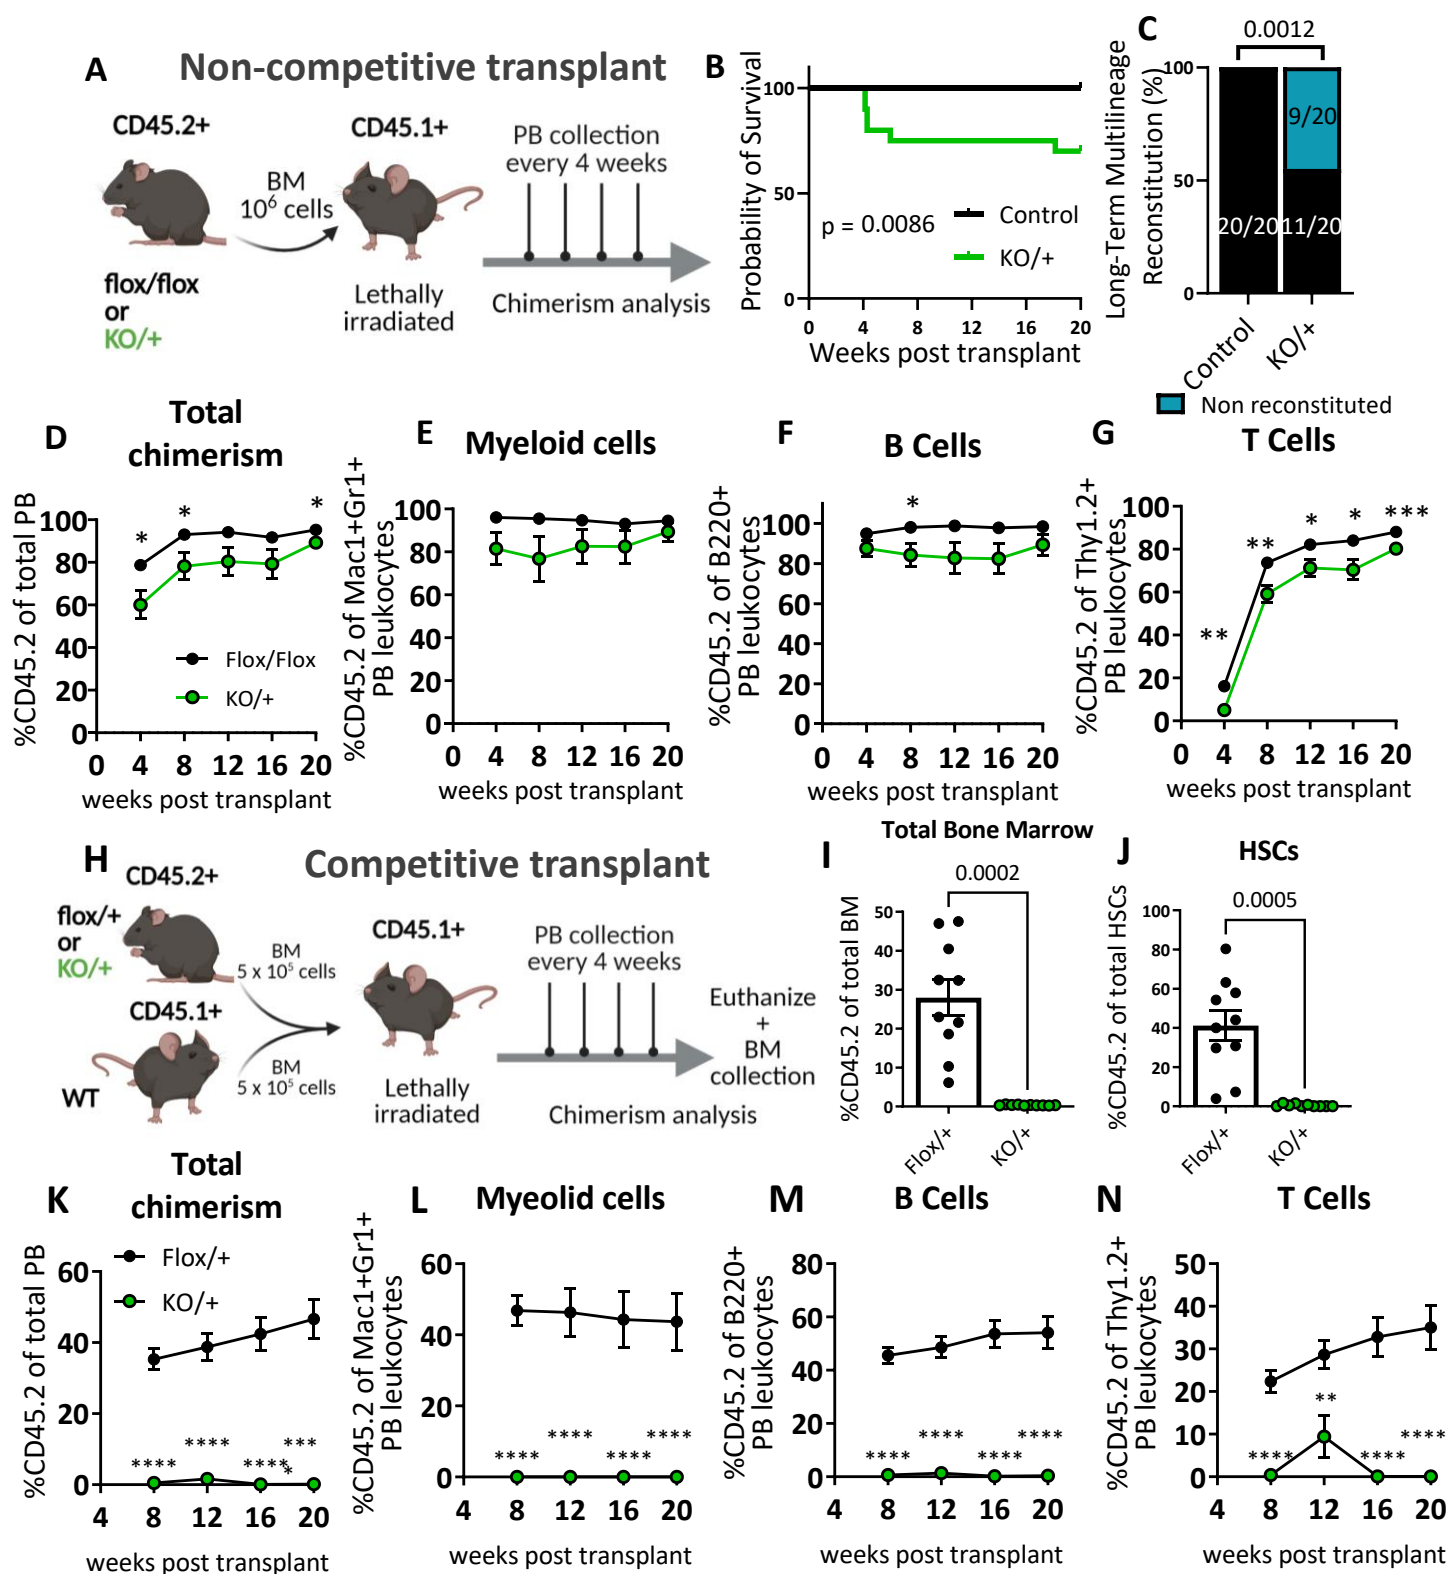

257 **The embryonic hematopoietic system is largely unaffected in *RpS12<sup>KO/+</sup>* animals**

258       The striking reduction of hematopoietic progenitor numbers in *RpS12<sup>KO/+</sup>* adult  
259 bone marrow prompted us to investigate if this phenotype could be a consequence of  
260 defective HSC production in the fetal liver during embryogenesis. We analyzed fetal liver  
261 hematopoietic populations of E13.5 *RpS12<sup>+/+</sup>* and *RpS12<sup>KO/+</sup>* embryos because it has  
262 been shown that HSC numbers increase, and differentiation begins, between days 12  
263 and 16 of embryogenesis in this organ (Sugiyama et al. 2011). First, we looked at the  
264 gross morphology and cellularity of the liver, neither of which were significantly different  
265 between the genotypes (Fig. 5A, B). Next, we assessed different stages of erythropoiesis  
266 using Ter119 and CD71 markers as previously described in fetal liver (Magee and Signer  
267 2021). Most of the cells in population V were lost during staining, and therefore we did  
268 not include them in our analysis. Compared to the control embryos, *RpS12<sup>KO/+</sup>* embryos  
269 showed no apparent impairment in erythropoiesis in the fetal liver (Fig. 5C, D). Finally,  
270 we analyzed the distribution of HSPCs in E13.5 embryos. Overall, we did not observe any  
271 significant changes in the frequencies of LT-HSCs (CD48<sup>-</sup>CD150<sup>+</sup> LSK), ST-HSCs (CD48<sup>-</sup>  
272 CD150<sup>-</sup> LSK), MPP (CD48<sup>+</sup> LSK), CMP, GMP or MEP populations (Fig. 5E-H). These  
273 results show that partial loss of RpS12 does not affect embryonic hematopoiesis by  
274 E13.5. Therefore, the later HSPC deficiency is not a consequence of a defect in  
275 embryonic specification.

276

277 ***RpS12<sup>KO/+</sup>* HSCs and some hematopoietic progenitors show higher translation,  
278 cycling and apoptosis**



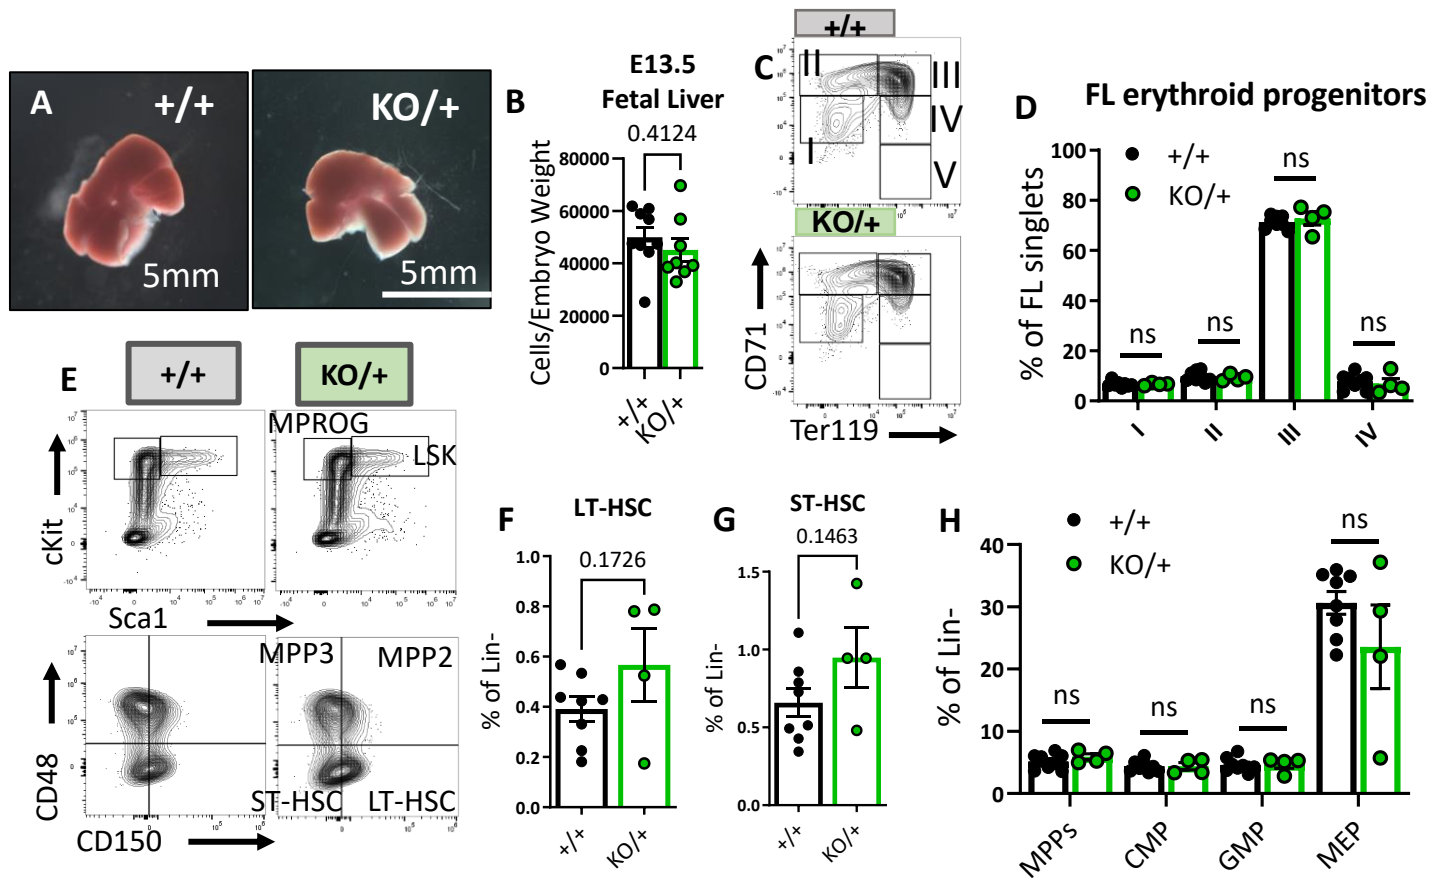

**Figure 5. Embryonic hematopoietic system is largely unaffected in *RpS12*<sup>KO/+</sup> animals.**

**(A)** Representative images of *RpS12*<sup>+/-</sup> and littermate E13.5 fetal livers. **(B)** Quantification of total number of cells per liver, normalized to embryo weight ( $+/+$  n=9 and  $KO/+$  n=8). **(C)** Representative flow cytometry gating of erythropoietic populations using Ter119 and CD71 markers of fetal liver samples from E13.5 embryos. **(E)** Representative flow cytometry gating of Lin<sup>-</sup> (top) and LSK (bottom) populations in E13.5 fetal livers. **(F,G,H)** LT-HSCs, ST-HSCs and indicated progenitor populations represented as percentages of the Lin<sup>-</sup> population in E13.5 fetal livers. **(D,F,G,H)** Biological samples are  $+/+$  n=8 and  $KO/+$  n=4.

Statistical analysis: quantifications represent mean  $\pm$  SEM, unpaired t-tests were performed to established significance among populations between genotypes \*p < 0.05, \*\*p < 0.01, \*\*\*p < 0.001, \*\*\*\*p < 0.0001

279           There are several important factors that maintain the HSC pool, including  
280 quiescence, low translation levels, and cell survival. We therefore analyzed the  
281 distribution of HSPCs among the cell cycle stages defined by the DNA content (Hoechst)  
282 and the levels of Ki67 (Fig. 6A). We observed a lower proportion of *RpS12<sup>KO/+</sup>* HSCs in  
283 the G0 stage of the cell cycle, and a significantly increased proportion in the actively  
284 cycling phases G1 and S/G2/M (Fig. 6B). Similar results were observed in MPP2/3 (LSK,  
285 Flk2<sup>-</sup>, CD48<sup>+</sup>), MPP4, and myeloid (MPROG) and common lymphoid progenitors (CLP)  
286 (Fig. 6B). These results show that compared to the control, *RpS12<sup>KO/+</sup>* HSCs are  
287 significantly less quiescent, with a higher proportion of HSCs and progenitors actively  
288 cycling.

289           Cell cycle activation generally requires translation, but previous studies have  
290 reported a generalized decrease in global translation in some Rp mutants, including in  
291 HSPC, despite a decrease in HSC quiescence (Oliver et al. 2004; Signer et al. 2014;  
292 Schneider et al. 2016). To test the global translation levels of each HSPC population in  
293 *RpS12* heterozygous mice using flow cytometry, we performed an *in vitro* assay on freshly  
294 isolated HSCs and progenitors using the puromycin analog o-propargyl puromycin (OPP)  
295 as previously described (Signer et al. 2014). Unexpectedly, compared to the *RpS12<sup>+/+</sup>*  
296 controls, *RpS12<sup>KO/+</sup>* HSCs and multipotent progenitor cell populations all showed  
297 increased levels of global translation (Fig. 6C, D). The difference was especially  
298 remarkable in HSCs. Interestingly, compared to the controls, *RpS12<sup>KO/+</sup>* myeloid  
299 progenitors did not exhibit differences in OPP intensity, and among different myeloid  
300 progenitor populations, only the megakaryocyte-erythrocyte progenitors (MEP) had a  
301 significant increase in OPP incorporation (Fig. 6E). Thus, these data suggest that a

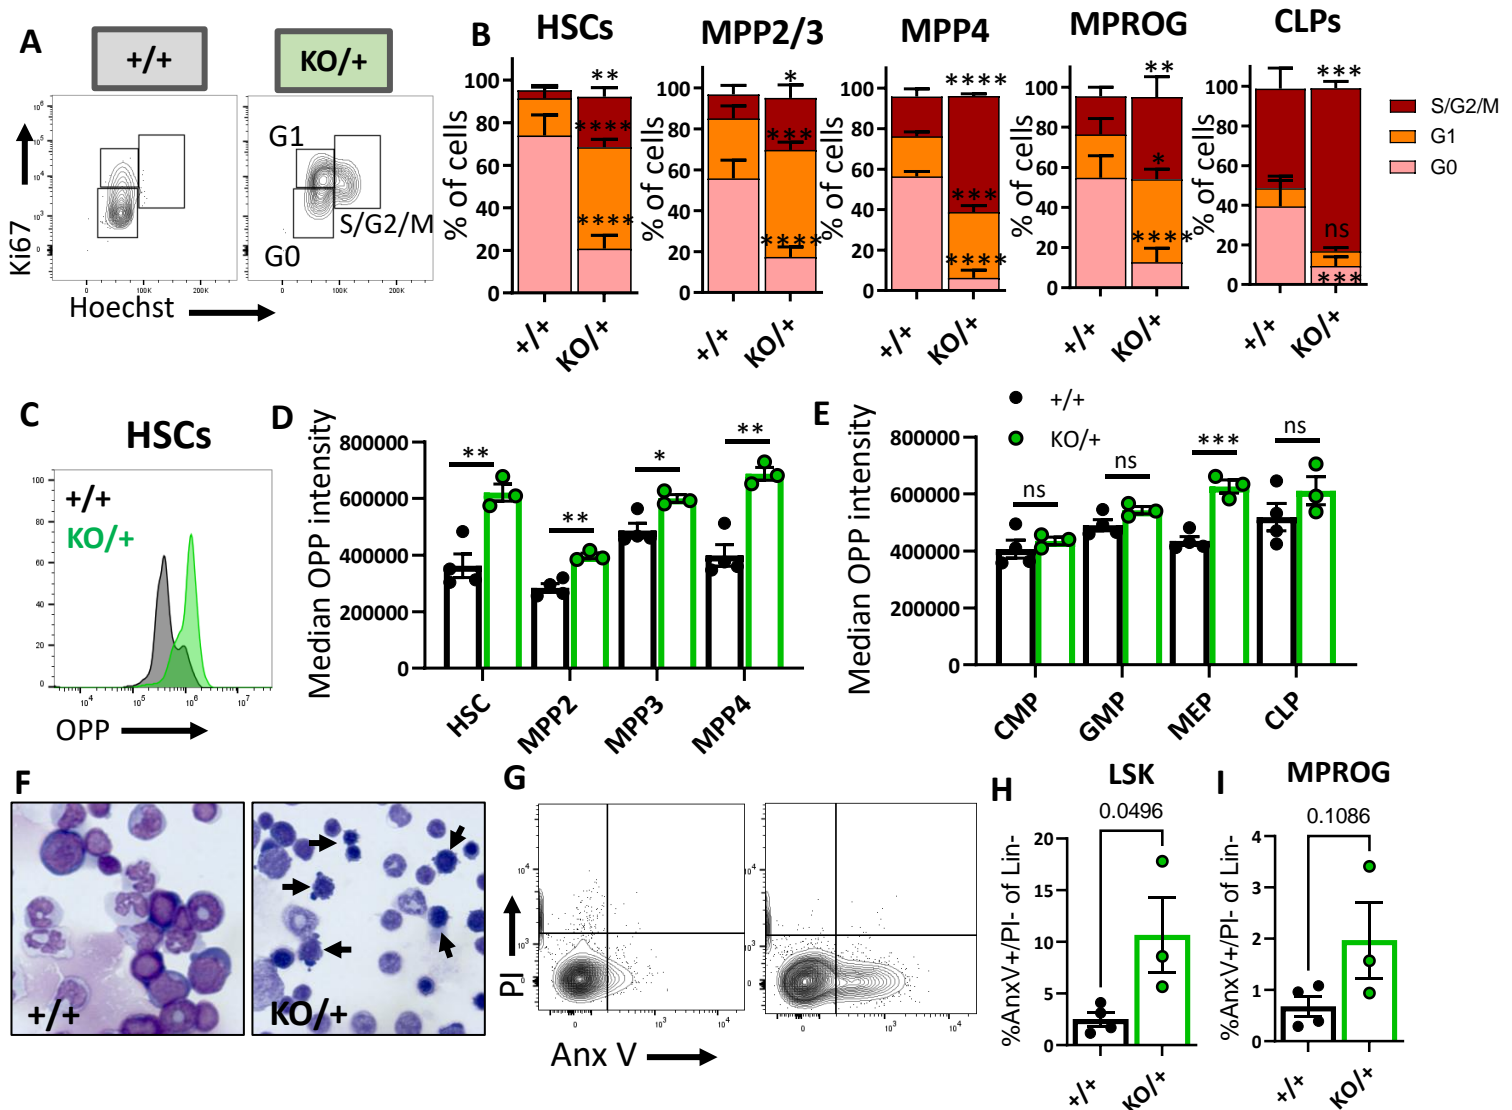

**Figure 6. HSCs and other hematopoietic progenitors have altered cycling, global translation levels and apoptosis in *Rps12*<sup>KO/+</sup> bone marrow.**

**(A)** Representative flow cytometry gating of HSCs (Flk2-CD48-LSK) cell cycle stages (G0, G1, S/G2/M) distribution determined by DNA (Hoechst) and Ki67 levels. **(B)** Cell cycle stages distribution in HSCs and in indicated progenitor populations. Asterisks correspond to p values assessing significant differences in each cell cycle stage between *Rps12*<sup>KO/+</sup> and *Rps12*<sup>+/+</sup> mice (6-8-weeks-old littermates, +/+ n=4 and KO/+ n=3). **(C)** Representative flow cytometry histogram showing OPP intensity in *Rps12*<sup>KO/+</sup> (green) and *Rps12*<sup>+/+</sup> (grey) HSCs. **(D, E)** Median OPP intensity of the indicated bone marrow populations (6-8-weeks-old littermates, +/+ n=4 and KO/+ n=3). This analysis was repeated in 6-7-month-old mice with similar results. **(F)** Representative images of bone marrow cytopspins showing high number of apoptotic cells (arrows) in *Rps12*<sup>KO/+</sup> samples. **(G)** Representative flow cytometry gating of LIN- population showing apoptotic populations as determined by AnnexinV and PI staining. **(H, I)** Percentage of apoptotic (AnnexinV+) cells in LSK (Lin<sup>-</sup>Kit<sup>+</sup>Sca1<sup>+</sup>) and Myeloid progenitor (MPROG; Lin<sup>-</sup>Kit<sup>+</sup>Sca1<sup>-</sup>) populations (6-8-weeks-old littermates, +/+ n=4 and KO/+ n=3). Statistical analysis: quantifications represent mean±SEM, two-way ANOVA (B-F) and unpaired t-tests were performed to established significance among populations between genotypes \*p < 0.05, \*\*p < 0.01, \*\*\*p < 0.001, \*\*\*\*p < 0.0001

302 decrease in *Rps12* leads to an abnormal increase in global protein translation in immature  
303 bone marrow populations, including HSCs.

304 Cell death can deplete the HSC pool, and can result from chronic HSC activation.  
305 We asked whether this reduction of HSCs in *RpS12<sup>KO/+</sup>* animals is due to an increase in  
306 apoptosis. Interestingly, compared to controls, *RpS12<sup>KO/+</sup>* animals have an increased  
307 number of apoptotic cells in bone marrow cytopins (Fig. 6F). To quantify the level of  
308 apoptosis in the immunophenotypic populations of the bone marrow cells, we used the  
309 flow cytometry markers PI and Annexin V together with population-specific cell surface  
310 markers (Fig. 6G). Our flow analysis confirmed a significant increase in apoptosis in  
311 Lineage<sup>-</sup>Sca1<sup>+</sup>c-Kit<sup>+</sup> (LSK) cells, a population that contains HSCs and MPPs, but not in  
312 more mature myeloid progenitors (Fig. 6H, I).

313

#### 314 ***RpS12<sup>KO/+</sup>* HSPCs have overactivated MEK/ERK and AKT/TOR signaling pathways**

315 Because *RpS12<sup>KO/+</sup>* mutants have increased translation, we assessed the activity  
316 of the AKT/MTOR pathway, since it is known to regulate translation. Since the AKT/MTOR  
317 pathway is activated by stem cell factor (SCF), we determined the level of the AKT/MTOR  
318 pathway activation in the presence and absence of SCF, by assessing the  
319 phosphorylation levels of phospho-AKT (Ser 473) and the MTOR downstream effectors  
320 phospho-S6 (Ser235/236) and phospho-4E-BP1 (Thr37/46). Our results show that, in the  
321 more immature LSK population, which is enriched for HSCs and MPPs, the levels of p-  
322 AKT, p-S6 and p-4E-BP1 were significantly elevated in *RpS12<sup>KO/+</sup>* animals compared to  
323 wild-type littermates, not only upon stem cell factor (SCF) stimulation, but even at the  
324 non-stimulated baseline. Indeed, the *RpS12<sup>KO/+</sup>* genotype alone was a more potent

325 activator than SCF (Fig. 7A-C). Interestingly, this was not the case for the more mature  
326 myeloid progenitor cells, where the levels of p-AKT, p-S6 and p-4E-BP1 are comparable  
327 to the controls in both non-stimulated and SCF-stimulated conditions, and these cells also  
328 exhibited more normal translation rates (Fig. 7D-F). Since phosphorylation of S6 and  
329 4EBP1 leads to increased translation, this data corroborates the increase in translation  
330 observed in the *RpS12<sup>KO/+</sup>* LSK population (Fig. 6D). Interestingly, more mature MPROG  
331 do not have increased translation (Fig. 6E) and do not have increased activation of the  
332 AKT/MTOR pathway (Fig. 7D-F). Together, these data suggest that activation of  
333 translation and the increase in AKT/MTOR signaling in *RpS12<sup>KO/+</sup>* mutant cells are  
334 specific to HSCs and MPPs.

335         Additionally, compared to wild-type controls, *RpS12<sup>KO/+</sup>* mutant animals also have  
336 increased phospho-ERK1 (Thr202/Tyr204) in the LSK and MPROG populations under  
337 SCF stimulated and non-stimulated conditions (Fig. 7G, H). Another regulator of  
338 translation is the eukaryotic initiation factor 2 $\alpha$  (eIF2 $\alpha$ ), which is required for CAP-  
339 dependent translation initiation. Cells respond to several stress conditions by  
340 phosphorylating eIF2 $\alpha$ , reducing global translation and upregulating stress-response  
341 genes (Wek et al. 2006; Sigurdsson and Miharada 2018). In skeletal muscle stem cells,  
342 eIF2 $\alpha$  phosphorylation promotes quiescence and stem cell maintenance (Zismanov et al.  
343 2016). Interestingly, compared to the control cells, *RpS12<sup>KO/+</sup>* cKit<sup>+</sup> bone marrow  
344 progenitor cells show decreased levels of p-eIF2 $\alpha$  (Fig.7I), which also correlates with  
345 increased translation.

346

347

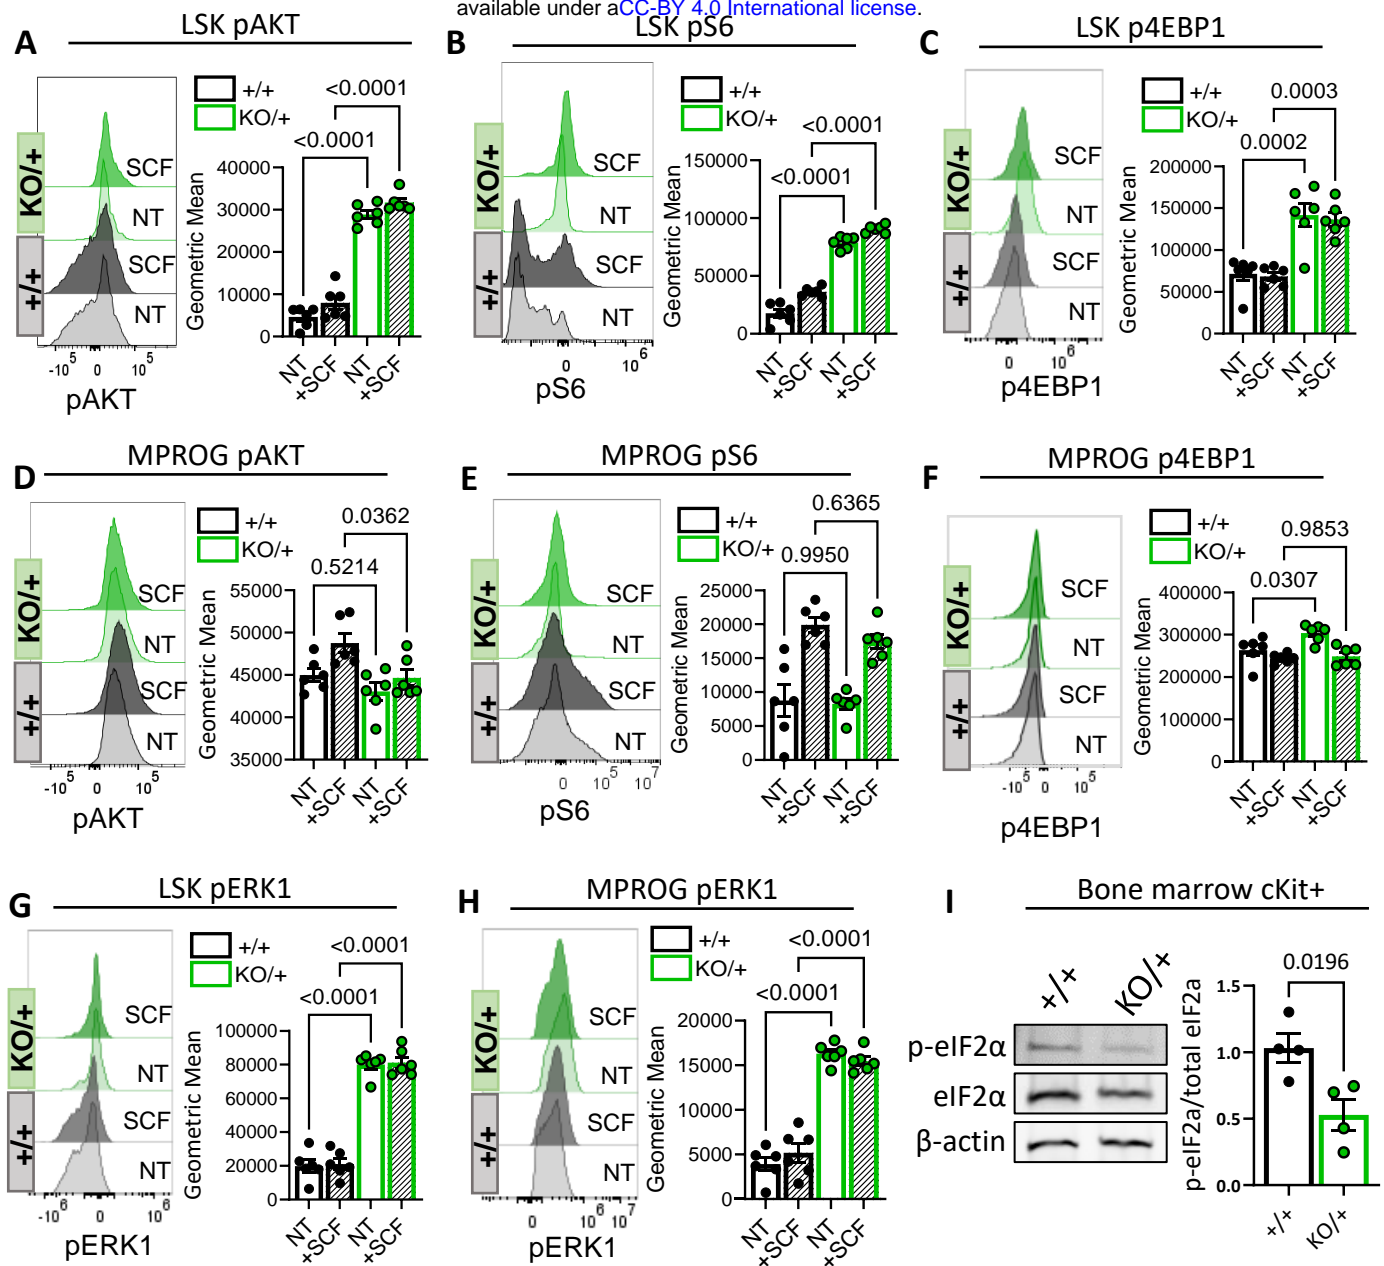

**Figure 7. Decreased Rps12 levels leads to the excessive activation of the AKT/MTOR and ERK signaling pathways.**

(A-H) Representative phospho-flow cytometry histograms and quantification of the normalized geometric mean fluorescent intensity of pAKT (Ser 473) (A,D), pS6 (Ser235/236) (B,E), p4EBP1 (Thr37/46) (C,F) and pERK1(Thr202/Tyr204) (D,H) signal in the LSK (A,B,C,G) and MPROG (D,E,F,H) bone marrow cell populations. Baseline signal was determined in the none treated (NT) serum starved cells, stimulation was done with the stem cell factor (SCF) *ex vivo* for 5 minutes. Immunophenotypic populations were defined as follows: LSK: Lin<sup>-</sup>cKit<sup>+</sup>Sca1<sup>+</sup>, MPROG: Lin<sup>-</sup>cKit<sup>+</sup>Sca1<sup>-</sup>. (I) Representative images of western blot analysis and quantification of phospho-eIF2 $\alpha$  normalized to the total eIF2 $\alpha$  protein in cKit-enriched BM samples (6-8-weeks-old littermates, +/+ n=4 and KO/+ n=4) (A-H) 7-weeks-old littermates, +/+ n=6 and KO/+ n=6 biological samples were used.

Statistical analysis: quantifications represent mean $\pm$ SEM, one-way ANOVA Tukey's multiple comparison's test were performed to established significance among samples between genotypes

348 **Discussion**

349 We generated an RpS12 knock-out mouse and describe the homozygous and  
350 heterozygous mutant phenotypes. Homozygous loss of *RpS12* was lethal during early  
351 embryogenesis. Similar to other *Rp* mutant mice, *RpS12* heterozygous mutants have  
352 reduced body size, skeletal defects, and anemia, and we showed that RpS12 is required  
353 for erythroid differentiation. Some of the mice also exhibited hydrocephalus.  
354 Heterozygous mice were viable with several visible phenotypes and blood cell defects.  
355 In many respects, *RpS12* mutant phenotypes resemble those of mice mutant for other *Rp*  
356 genes, including defective erythropoiesis, suggesting that *RpS12* could be a candidate  
357 gene for DBA.

358 Most strikingly, we report that RpS12 is also crucial for normal hematopoietic stem  
359 cell self-renewal and differentiation, with defective engraftment and long-term  
360 repopulation of *Rps12<sup>KO/+</sup>* bone marrow in transplantation experiments. This seems  
361 specific to adult HSCs, as no hematopoietic defect was observed in the fetal livers of  
362 *RpS12<sup>KO/+</sup>* embryos. Although we have not determined whether the transition from the  
363 fetal liver to the bone marrow occurs normally, such a defect would only be expected to  
364 delay bone marrow engraftment, and does not seem sufficient to explain the chronically  
365 defective HSC function and striking loss of HSC quiescence that we observe in *RpS12<sup>KO/+</sup>*  
366 adult mice.

367 The loss of bone marrow HSC quiescence was associated with chronic activation  
368 of Akt/mTor and Erk, increased translation, and HSC apoptosis. Chronic activation of the  
369 AKT/MTOR pathway has been shown to result in increased HSC cycling, apoptosis, and

370 decreased self-renewal (Chen et al. 2008; Kharas et al. 2010), which could explain the  
371 HSPC exhaustion phenotype and increased HSPC apoptosis in *RpS12<sup>KO/+</sup>* mice. Fetal  
372 liver HSCs, which were unaffected in *RpS12<sup>KO/+</sup>*, normally have a higher proliferative  
373 activity and higher translation rates than adult HSCs (Magee and Signer 2021), which  
374 may be why they are less sensitive to heterozygous deletion of RpS12.

375         The increase in HSPC-specific, global translation upon heterozygous deletion of  
376 *RpS12* is the opposite of what has been reported in *RpL24<sup>Bst/+</sup>* and *RpS14<sup>+/-</sup>* HSPCs  
377 (Signer et al. 2014; Schneider et al. 2016), although there are other *Rp* genotypes where  
378 HSC cycling is increased (Terzian et al. 2011; Schneider et al. 2016). However, it is  
379 consistent with the increased translation that has been reported in mice with deletion of  
380 *Pten* in HSCs, which leads to activation of the AKT/MTOR pathway (Signer et al. 2014).  
381 Importantly, detailed studies of RpS12 depletion from ribosomes in yeast clearly  
382 demonstrate a strong reduction in translation as a result (Martin-Villanueva et al. 2020).  
383 Unless RpS12 has a different function in mice, or in HSPCs, this raises the possibility that  
384 enhanced translation in *RpS12<sup>KO/+</sup>* cells might be due, not to enhanced translation by  
385 ribosomes lacking RpS12, but to increased activity of the remaining intact ribosomes that  
386 contain RpS12. Such an increase would in fact be expected as a result of the striking  
387 activation of the AKT/MTOR and ERK pathways. *RpS12<sup>KO/+</sup>* c-Kit<sup>+</sup> hematopoietic  
388 progenitors also have lower phosphorylated eIF2 $\alpha$ , which would also predict higher  
389 translation levels.

390         It remains to be determined how *RpS12* haploinsufficiency leads to activation of  
391 the AKT/MTOR and ERK signaling pathways, which has not been reported in other *Rp*



392 mutants. It is interesting that a regulatory role has been suggested for RpS12 in  
393 *Drosophila*, where multiple properties of *Rp* mutant cells, including translation, depend on  
394 RpS12-dependent activation of a transcriptional stress response mediated by the  
395 *Drosophila* transcription factor Xrp1, although the molecular mechanism is not yet known  
396 (Kale et al. 2018; Boulan et al. 2019; Ji et al. 2019). It is possible that mouse RpS12,  
397 either through an effect on specific translation or otherwise, plays a particular role in  
398 regulating HSC quiescence, through the direct or indirect activation of the AKT/MTOR  
399 and ERK pathways. However, it is also possible that HSC activation occurs indirectly, as  
400 a consequence of HSC apoptosis. In addition, we cannot exclude the possibility that  
401 RpS12 deletion in the bone marrow niche could lead to a loss of HSC quiescence through  
402 a non-autonomous mechanism. Specific RpS12 functions that have been suggested in  
403 mammalian cells and cancers could now be explored using this conditional knock-out  
404 model with tissue specific Cre-drivers (Derenzini et al. 2019; Brumwell et al. 2020;  
405 Katanaev et al. 2020).

406         The fact that *RpS12*<sup>KO/+</sup> mice exhibit fully-penetrant pancytopenia with a severe  
407 bone marrow failure phenotype, in addition to the erythropoiesis defect, raises the  
408 possibility that *RpS12* might not have been found mutated in DBA patients due to a more  
409 severe human phenotype that is not classified as DBA. Perhaps only a hypomorphic  
410 *RpS12* genotype could be associated with DBA. It is also the case, however, that caution  
411 is required extrapolating from mouse phenotypes to human. Nevertheless, our study  
412 raises the possibility that *Rps12* could in fact be a candidate gene not only for DBA, but  
413 for a broader group of bone marrow failure disorders. One of the reasons that genetic  
414 alterations in *RpS12* have not yet been reported in DBA or other bone marrow failure

415 disorders could be that RpS12 is not included in the most common targeted next  
416 generation sequencing (NGS) panels used in the diagnosis of these disorders, some of  
417 which report molecular diagnostic rates of only 44-59% (Ghemlas et al. 2015; Muramatsu  
418 et al. 2017; Galvez et al. 2021). We suggest that in the future RpS12 should be included  
419 in expanded NGS panels for bone marrow failure disorders, or should be sequenced in  
420 the patients in whom there are no molecular findings in the standard NGS panels.

421

## 422 **Methods**

### 423 **Generation of RpS12<sup>flox</sup> knock-in mice**

424 A pair of guide-RNAs (gRNAs) targeting intron 1 and intron 3 of *RpS12* gene respectively  
425 were designed by an online tool (<http://crispr.mit.edu/>) and generated by in vitro  
426 transcription. Cas9 mRNA was purchased from SBI. An *RpS12* conditional knockout  
427 homology-directed repair (HDR) plasmid containing 2kb homologous arms at each side  
428 and exon 2 and 3 flanked by loxP sites (Supp. Fig. 1) was generated by SLiCE cloning.  
429 Super ovulated female C57BL/6J mice (3–4 weeks old) were mated to C57BL/6J males,  
430 and fertilized embryos were collected from oviducts. The gRNAs, Cas9 mRNA and  
431 conditional knockout HDR plasmid were microinjected into the cytoplasm of fertilized  
432 eggs. The injected zygotes were transferred into pseudo pregnant CD1 females and the  
433 resulting pups were genotyped. Out of 20 pups, 2 mice were identified as *RpS12<sup>flox/+</sup>*,  
434 which were then crossed to obtain *RpS12<sup>flox/flox</sup>* (*Rps12<sup>em1Nbakr</sup>* MGI:6388411). The  
435 corresponding DNA sequences can be found in Supplementary table 1.

436

## 437 **Mice**

438 All animals were housed at the Animal Housing and Studies Facility at Albert Einstein  
439 College of Medicine (AECOM) under pathogen-free conditions and experiments were  
440 performed following protocols approved by the Institutional Animal Care and Use  
441 Committee (IACUC) (Protocol #20181206). C57BL/6J and Ella-Cre (FVB/N-Tg(Ella-  
442 cre)C5379Lmgd/J) mice were obtained from Jackson. B6.SJL-Ptprca/BoyAiTac (CD45.1)  
443 mice from Taconic were used for transplantation experiments. To generate *RpS12<sup>KO/+</sup>*  
444 mice, we crossed *RpS12<sup>flox/flox</sup>* to Ella-Cre mice and used primers flanking the floxed  
445 region to identify progeny where recombination had occurred. Unless indicated, these  
446 mice were kept as heterozygous by crossing them with C57BL/6J and the presence of  
447 the Ella-Cre locus was crossed out. In each case, the genotypes were confirmed by PCR  
448 using genomic DNA extracted from tails using DNeasy kit from Qiagen (#69504).  
449 Peripheral blood samples were collected via facial vein bleeding under isoflurane  
450 anesthesia, and blood counts obtained using the Genesis analyzer (Oxford Science). To  
451 generate growth curves, 5-day-old pups were genotyped and numbered by cutting toes.  
452 Pups' weight was measured daily from day 5 to day 21 of age.

453

## 454 **Preparation of the single cell suspension**

455 Bone marrow single cell suspension was prepared from freshly harvested femurs, tibiae,  
456 ilia, and vertebrae by gentle crushing of the bones in phosphate buffered saline containing  
457 2% fetal bovine serum (PBS/2% FBS) followed by filtration through a 40- $\mu$ m strainer.  
458 Spleen cells were obtained from freshly harvested spleens. Single cell suspension was  
459 prepared by dissociating spleens using the flat end of a plunger against in 40- $\mu$ m strainers

460 and washed with PBS/2% FBS. Fetal liver single cell suspension was prepared from  
461 freshly harvested E13.5 fetal livers by passing through a 200- $\mu$ l pipet tip and filtered  
462 through a 40- $\mu$ m strainer in PBS/2% FBS. Cells were subjected to RBC lysis (Qiagen)  
463 according to the manufacturers protocol and used for the further steps described below.  
464 To calculate absolute number of cells per femur one femur per mouse was flushed, RBC  
465 lysed and cells counted to obtain total number of cells per femur.

466

#### 467 **Flow cytometry on live cells**

468 **Bone marrow:** Single cell bone marrow suspensions were stained with a cocktail of  
469 biotin-conjugated lineage antibodies for 30min at 4°C, washed with PBS/2% FBS, stained  
470 with fluorochrome-conjugated antibody cocktails for 30min at 4°C, washed with PBS/2%  
471 FBS, resuspended in PBS/2% FBS, filtered through a 40- $\mu$ m strainer, and subjected to  
472 Flow analysis. For the antibody panels, refer to Supplementary Tables 2 and 3.

473 **Peripheral blood:** samples were subjected to RBC lysis, blocked with CD16/CD32 10min  
474 at 4°C followed by staining with fluorochrome-conjugated antibodies, washed with  
475 PBS/2% FBS, resuspended in PBS/2% FBS, filtered through a 40- $\mu$ m strainer and  
476 subjected to Flow analysis. For the antibody panels, refer to Supplementary Table 2 and  
477 3.

478 **Erythropoiesis analysis:** Obtained single cell suspension of spleen cells (without RBC  
479 lysis) was blocked with CD16/CD32 for 10 min at 4°C and stained with fluorochrome-  
480 conjugated antibodies for 30 min at 4°C (Supplementary Table 3). E13.5 fetal livers single  
481 cell suspension was blocked with CD16/CD32 10min at 4°C and stained with

482 erythropoiesis or progenitor panels as described above. All blocking and staining steps  
483 were performed in PBS/2% FBS.

484 **Apoptosis analysis:** Single cell suspension samples were stained with the lineage-  
485 cocktail and fluorochrome-conjugated antibody cocktails as described above. After  
486 completion surface antibody staining, samples were incubated with FITC-conjugated  
487 Annexin V (BD-560931) and Propidium Iodide (BD-556463) following the manufacturer's  
488 instructions.

489 All flow cytometry was performed with BD FACS LSRII or Cytex Aurora and data analysis  
490 was done with FlowJo Software (v9, v10).

491

#### 492 **Flow cytometry on fixed cells**

493 **Cell cycle:** Fresh single cell suspension of the RBC lysed bone marrow cells was stained  
494 with lineage antibodies followed by staining with fluorochrome-conjugated antibodies  
495 against surface markers, as described above. Immediately after staining cells were fixed  
496 and permeabilized using Cytotfix/Cytoperm™ Fixation/Permeabilization Solution Kit (BD  
497 biosciences, BDB554714) according to the manufacturer's instructions. Followed fixation,  
498 cells were incubated overnight at 4°C with FITC-conjugated Ki67 antibody in Perm/Wash  
499 buffer. DNA was stained with 25µl/ml Hoechst in Perm/Wash buffer before flow cytometry  
500 analysis. Flow cytometry was performed with BD FACS LSRII or Cytex Aurora and data  
501 analysis was done with FlowJo Software (v9, v10).

502 **Global translation *in vitro*:** protocol was based on a previously described assay (Signer  
503 et al. 2014). Single cell bone marrow RBC lysed cell suspension was obtained as  
504 described. Cells were resuspended in DMEM (Corning 10-013-CV) media supplemented

505 with 50  $\mu$ M  $\beta$ -mercaptoethanol (Sigma) and 20  $\mu$ M OPP (Thermo Scientific C10456).  
506 Cells were incubated for 45 minutes at 37°C and then washed with Ca<sup>2+</sup> and Mg<sup>2+</sup> free  
507 PBS. The samples were stained with biotin-labeled antibodies, followed by staining with  
508 fluorochrome-conjugated antibody cocktails, fixed and permeabilized using  
509 Cytotfix/Cytoperm™ as described above. After permeabilization with Perm/Wash buffer,  
510 cells were resuspended in Click-iT® Plus Reaction Cocktail (Thermo Scientific C10456)  
511 containing azide conjugated to Alexa Fluor 488 for 30 minutes at room temperature,  
512 washed once with Click-iT® Reaction Rinse Buffer and resuspended in Perm/Wash  
513 buffer. Flow cytometry was performed with Cytex Aurora and data analysis was done with  
514 FlowJo Software (v9, v10).

515 **Phospho-flow cytometry:** Bone marrow cells were starved for 1 hour in IMDM 2% FBS  
516 at 37°C, stained with lineage antibodies, followed by staining with fluorochrome-  
517 conjugated antibodies against surface markers, as described above. Post staining cells  
518 stimulated with 100ng/ml mSCF (Peprotech #250-03) in 2% PBS-FBS for 5 min at 37°C.  
519 Stained and stimulated cells were fixed and permeabilized with Cytotfix/Cytoperm as  
520 described above and stained with phospho-S6 (Ser235/236) - Alexa 488 (Cell Signaling  
521 Technology, 4803S) (1:100) and phospho-AKT (Ser473) - Alexa647 (Cell Signaling  
522 Technology, 2337S), phospho-4E-BP1 (Thr37/46) -Alexa Fluor647 -(Cell Signaling  
523 Technology, 5123S) of pERK1(T202/Y204) - Alexa 488 (Cell Signaling 4374) at 1:20  
524 dilutions. Cells were washed with Perm/Wash buffer to remove residual and unbound  
525 antibody, and resuspended in fresh Perm/Wash buffer, followed by flow cytometry  
526 analysis on the Cytex Aurora. Analysis of all flow cytometry data was performed using  
527 FlowJo software (v9, v10).

528

### 529 **Methylcellulose cultures and serial re-plating**

530 Single cell bone marrow suspensions (post RBC lysis) or single cell fetal liver cell  
531 suspensions (without RBC lysis) were resuspended in RPMI media supplemented with  
532 10%FBS and 1% penicillin/streptomycin. Cells were manually counted on a  
533 hemocytometer using Trypan blue and plated in methylcellulose media (M3434 or M3334,  
534 Stem Cell Technologies) at a density of  $5 \times 10^5$  live cells/ml (in M3434) or  $10^4$  live cells/ml  
535 (in M3334) in 35mm cell culture plates. Samples were incubated at  $37^\circ\text{C}$  in 6.5%  $\text{CO}_2$  at  
536 constant humidity. Colonies were scored and evaluated 7-10 days after plating. To  
537 replate, cells were washed from the plates with RPMI media, counted, and re-plated in  
538 fresh M3334 methylcellulose at a density of  $10^4$  live cells/dish in 35mm plates. This  
539 process was repeated until cell exhaustion in one of the experimental groups.

540

### 541 **Bone marrow transplantation**

542 6-8-week-old B6.SJL (CD45.1) recipient mice were lethally irradiated with a single dose  
543 of 950 Gy using a Cesium-137 gamma-ray irradiator (Mark I irradiator Model 68) at least  
544 3 hours before transplantation. For non-competitive assays,  $10^6$  whole bone marrow cells  
545 from a donor control (*RpS12<sup>flox/flox</sup>* or *RpS12<sup>flox/+</sup>*) or *RpS12<sup>KO/+</sup>* mouse (CD45.2) were  
546 injected into the retro-orbital venous sinus of recipient mice under isoflurane anesthesia.  
547 For competitive transplants,  $10^5$  whole bone marrow cells from control *RpS12<sup>flox/+</sup>* or  
548 *RpS12<sup>KO/+</sup>* donor mouse (CD45.2), and  $10^5$  competitor cells from a B6.SJL (CD45.1)  
549 mouse were injected into each recipient mouse. Mice were given drinking water treated  
550 with 100mg/ml Baytril100 (Bayer) for 3 weeks after transplantation. Peripheral blood was

551 collected every 4 weeks and animals were euthanized at the specified experimental time  
552 points.

553

### 554 **Western blot analysis**

555 Whole bone marrow cells were enriched for cKit<sup>+</sup> cells using CD117 MicroBeads and  
556 MACS LS Columns (Miltenyi Biotec 130-091-224 and 130-042-401) following the  
557 manufacturer's protocol.  $2 \times 10^6$  cKit enriched cells were resuspended in 150  $\mu$ l Laemmli  
558 buffer (BioRad 1610737) supplemented with 1:10  $\beta$ -mercaptoethanol, passed through a  
559 25-G needle to break the DNA and incubated at 95°C for 5 minutes. An equal amount of  
560 each sample was separated in polyacrylamide gels (BioRad 4568081), transferred to  
561 nitrocellulose membrane (Licor) and blocked (Licor 927-90001). IRDye near-infrared  
562 secondary antibodies (Licor) were used to visualize the proteins. The following primary  
563 antibodies were used: RpS12 (Proteintech; polyclonal),  $\beta$ -actin (Cell Signaling; 13E5),  
564 eIF2 $\alpha$  (Cell signaling, 5324T), phospho-eIF2 $\alpha$  (Thermo Scientific; Ser52; polyclonal).

565

### 566 **Histology**

567 Peripheral blood smears and cytopins from RBC lysed bone marrow samples were  
568 stained using the Hema 3 System (Fisher) following the manufacturer's instructions. The  
569 images were acquired using a Zeiss Axiovert microscope with a digital camera.

570

### 571 **Statistical methods**

572 Two-tailed Student's t-tests were performed to compare statistical significance between  
573 two samples. When comparing more than 2 groups, one-way ANOVA tests were



574 performed with the Turkey's multiple comparison test. For presence/absence of  
575 phenotype, statistical significance was calculated with Fisher's exact test. Analysis was  
576 done using GraphPad Prism v9.

577

## 578 **Reagents**

579 All antibodies used for flow cytometry assays, and primers used for CRISPR gene editing  
580 and PCR can be found in Supplementary Tables 1, 2, and 3. All other reagents are  
581 mentioned in the methods section.

582

## 583 **Acknowledgments**

584 This work was supported by National Institutes of Health grants R01GM104213 (to  
585 N.E.B.), R01CA196973 (to K.G.), an award from the Albert Einstein College of Medicine  
586 Human Genetics Program (to N.E.B.), startup funds from the Albert Einstein College of  
587 Medicine and Albert Einstein Cancer Center (to K.G.), the NHLBI/NIH Ruth L. Kirschstein  
588 National Research Service Award F32HL146119 (to K.A.), and the IRACDA/BETTR  
589 training Institutional Research and Academic Career Development Award  
590 2K12GH102779-07A1 (to K.A). For flow cytometry this work utilized the analyzers Cytex  
591 Aurora Multiparameter Flow Cytometer and BD LSR-II with the help from Dr. Jinghang  
592 Zhang, Dr. Yu Zhang and Aodengtuya Fnu. The Cytex Aurora Multiparameter Flow  
593 Cytometer was purchased with funding from the National Institutes of Health SIG grant  
594 #1S10OD026833-01. Data in this paper are from a thesis to be submitted in partial  
595 fulfillment of the requirements for the Degree of Doctor of Philosophy in the Biomedical  
596 Sciences, Albert Einstein College of Medicine.

597

598

599 K.G. receives research funding from iOnctura, S.A. The authors have no additional  
600 financial interests.

601

## 602 References

- 603 Baker NE. 2020. Emerging mechanisms of cell competition. *Nat Rev Genet* **21**: 683-697.
- 604 Boulan L, Andersen D, Colombani J, Boone E, Leopold P. 2019. Inter-Organ Growth Coordination Is  
605 Mediated by the Xrp1-Dilp8 Axis in *Drosophila*. *Dev Cell* **49**: 811-818 e814.
- 606 Brumwell A, Fell L, Obress L, Uniacke J. 2020. Hypoxia influences polysome distribution of human  
607 ribosomal protein S12 and alternative splicing of ribosomal protein mRNAs. *Rna* **26**: 361-371.
- 608 Cabezas-Wallscheid N, Buettner F, Sommerkamp P, Klimmeck D, Ladel L, Thalheimer FB, Pastor-Flores D,  
609 Roma LP, Renders S, Zeisberger P et al. 2017. Vitamin A-Retinoic Acid Signaling Regulates  
610 Hematopoietic Stem Cell Dormancy. *Cell* **169**: 807-+.
- 611 Chen C, Liu Y, Liu R, Ikenoue T, Guan KL, Liu Y, Zheng P. 2008. TSC-mTOR maintains quiescence and function  
612 of hematopoietic stem cells by repressing mitochondrial biogenesis and reactive oxygen species.  
613 *J Exp Med* **205**: 2397-2408.
- 614 Clavería C, Torres M. 2016. Cell Competition: Mechanisms and Physiological Roles. *Annual Review of Cell  
615 and Developmental Biology* **32**: 411-439.
- 616 de la Cruz J, Karbstein K, Woolford JL, Jr. 2015. Functions of ribosomal proteins in assembly of eukaryotic  
617 ribosomes in vivo. *Annu Rev Biochem* **84**: 93-129.
- 618 Derenzini E, Agostinelli C, Rossi A, Rossi M, Scellato F, Melle F, Motta G, Fabbri M, Diop F, Kodipad AA et  
619 al. 2019. Genomic alterations of ribosomal protein genes in diffuse large B cell lymphoma. *Br J  
620 Haematol* **185**: 330-334.
- 621 Fonseca BD, Smith EM, Yelle N, Alain T, Bushell M, Pause A. 2014. The ever-evolving role of mTOR in  
622 translation. *Seminars in cell & developmental biology* **36**: 102-112.
- 623 Galvez E, Vallespin E, Arias-Salgado EG, Sanchez-Valdepenas C, Gimenez Y, Navarro S, Rio P, Bogliolo M,  
624 Pujol R, Peiro M et al. 2021. Next-generation Sequencing in Bone Marrow Failure Syndromes and  
625 Isolated Cytopenias: Experience of the Spanish Network on Bone Marrow Failure Syndromes.  
626 *Hemasphere* **5**: e539.
- 627 Geiger T, Wehner A, Schaab C, Cox J, Mann M. 2012. Comparative proteomic analysis of eleven common  
628 cell lines reveals ubiquitous but varying expression of most proteins. *Mol Cell Proteomics* **11**:  
629 M111.014050-M014111.014050.
- 630 Gentilella A, Kozma SC, Thomas G. 2015. A liaison between mTOR signaling, ribosome biogenesis and  
631 cancer. *Biochimica et biophysica acta* **1849**: 812-820.
- 632 Ghemlas I, Li H, Zlateska B, Klaassen R, Fernandez CV, Yanofsky RA, Wu J, Pastore Y, Silva M, Lipton JH et  
633 al. 2015. Improving diagnostic precision, care and syndrome definitions using comprehensive  
634 next-generation sequencing for the inherited bone marrow failure syndromes. *J Med Genet* **52**:  
635 575-584.
- 636 Hidalgo San Jose L, Sunshine MJ, Dillingham CH, Chua BA, Kruta M, Hong Y, Hatters DM, Signer RAJ. 2020.  
637 Modest Declines in Proteome Quality Impair Hematopoietic Stem Cell Self-Renewal. *Cell Rep* **30**:  
638 69-80 e66.
- 639 Jaako P, Flygare J, Olsson K, Quere R, Ehinger M, Henson A, Ellis S, Schambach A, Baum C, Richter J et al.  
640 2011. Mice with ribosomal protein S19 deficiency develop bone marrow failure and symptoms  
641 like patients with Diamond-Blackfan anemia. **118**: 6087-6096.
- 642 Ji Z, Kiparaki M, Folgado V, Kumar A, Blanco J, Rimesso G, Chuen J, Liu Y, Zheng D, Baker NE. 2019.  
643 *Drosophila* RpS12 controls translation, growth, and cell competition through Xrp1. *PLoS Genet* **15**:  
644 e1008513.

- 645 Kale A, Ji Z, Kiparaki M, Blanco J, Rimesso G, Flibotte S, Baker NE. 2018. Ribosomal Protein S12e Has a  
646 Distinct Function in Cell Competition. *Dev Cell* **44**: 42-55 e44.
- 647 Katanaev VL, Kryuchkov M, Averkov V, Savitsky M, Nikolaeva K, Klimova N, Khaustov S, Solis GP. 2020.  
648 HumanaFly: high-throughput transgenesis and expression of breast cancer transcripts in  
649 *Drosophila* eye discovers the RPS12-Wingless signaling axis. *Sci Rep* **10**: 21013.
- 650 Kazerounian S, Ciarlini PDSC, Yuan D, Ghazvinian R, Alberich-Jorda M, Joshi M, Zhang H, Beggs AH, Gazda  
651 HT. 2016. Development of Soft Tissue Sarcomas in Ribosomal Proteins L5 and S24 Heterozygous  
652 Mice. *Journal of Cancer* **7**: 32-36.
- 653 Kharas MG, Okabe R, Ganis JJ, Gozo M, Khandan T, Paktinat M, Gilliland DG, Gritsman K. 2010.  
654 Constitutively active AKT depletes hematopoietic stem cells and induces leukemia in mice. *Blood*  
655 **115**: 1406-1415.
- 656 Kondrashov N, Pusic A, Stumpf CR, Shimizu K, Andrew, Xue S, Ishijima J, Shiroishi T, Barna M. 2011.  
657 Ribosome-Mediated Specificity in Hox mRNA Translation and Vertebrate Tissue Patterning. *Cell*  
658 **145**: 383-397.
- 659 Krieg J, Hofsteenge J, Thomas G. 1988. Identification of the 40 S ribosomal protein S6 phosphorylation  
660 sites induced by cycloheximide. *The Journal of biological chemistry* **263**: 11473-11477.
- 661 Lee JY, Nakada D, Yilmaz OH, Tothova Z, Joseph NM, Lim MS, Gilliland DG, Morrison SJ. 2010. mTOR  
662 activation induces tumor suppressors that inhibit leukemogenesis and deplete hematopoietic  
663 stem cells after Pten deletion. *Cell stem cell* **7**: 593-605.
- 664 Magee JA, Ikenoue T, Nakada D, Lee JY, Guan KL, Morrison SJ. 2012. Temporal Changes in PTEN and  
665 mTORC2 Regulation of Hematopoietic Stem Cell Self-Renewal and Leukemia Suppression. *Cell*  
666 *stem cell* **11**: 415-428.
- 667 Magee JA, Signer RAJ. 2021. Developmental Stage-Specific Changes in Protein Synthesis Differentially  
668 Sensitize Hematopoietic Stem Cells and Erythroid Progenitors to Impaired Ribosome Biogenesis.  
669 *Stem Cell Reports* **16**: 20-28.
- 670 Martin-Villanueva S, Fernandez-Fernandez J, Rodriguez-Galan O, Fernandez-Boraita J, Villalobo E, de La  
671 Cruz J. 2020. Role of the 40S beak ribosomal protein eS12 in ribosome biogenesis and function in  
672 *Saccharomyces cerevisiae*. *RNA Biol* **17**: 1261-1276.
- 673 Marygold SJ, Roote J, Reuter G, Lambertsson A, Ashburner M, Millburn GH, Harrison PM, Yu Z, Kenmochi  
674 N, Kaufman TC et al. 2007. The ribosomal protein genes and Minute loci of *Drosophila*  
675 *melanogaster*. *Genome Biol* **8**: R216.
- 676 Matsson H, Davey EJ, Draptchinskaia N, Hamaguchi I, Ooka A, Leveen P, Forsberg E, Karlsson S, Dahl N.  
677 2004. Targeted Disruption of the Ribosomal Protein S19 Gene Is Lethal Prior to Implantation. **24**:  
678 4032-4037.
- 679 McGowan KA, Li JZ, Park CY, Beaudry V, Tabor HK, Sabnis AJ, Zhang W, Fuchs H, De Angelis MH, Myers RM  
680 et al. 2008. Ribosomal mutations cause p53-mediated dark skin and pleiotropic effects. *Nature*  
681 *Genetics* **40**: 963-970.
- 682 Morata G, Ripoll P. 1975. Minutes: Mutants of *Drosophila* autonomously affecting cell division rate.  
683 *Developmental Biology* **42**: 211-221.
- 684 Morgado-Palacin L, Varetti G, Llanos S, Gomez-Lopez G, Martinez D, Serrano M. 2015. Partial Loss of Rpl11  
685 in Adult Mice Recapitulates Diamond-Blackfan Anemia and Promotes Lymphomagenesis. *Cell Rep*  
686 **13**: 712-722.
- 687 Muramatsu H, Okuno Y, Yoshida K, Shiraishi Y, Doisaki S, Narita A, Sakaguchi H, Kawashima N, Wang X, Xu  
688 Y et al. 2017. Clinical utility of next-generation sequencing for inherited bone marrow failure  
689 syndromes. *Genet Med* **19**: 796-802.
- 690 Oliver ER, Saunders TL, Tarle SA, Glaser T. 2004. Ribosomal protein L24 defect in belly spot and tail (Bst),  
691 a mouse Minute. *Development* **131**: 3907-3920.

- 692 Petibon C, Malik Ghulam M, Catala M, Abou Elela S. 2020. Regulation of ribosomal protein genes: An  
693 ordered anarchy. *Wiley Interdiscip Rev RNA*: e1632.
- 694 Pietras EM, Reynaud D, Kang YA, Carlin D, Calero-Nieto FJ, Leavitt AD, Stuart JM, Gottgens B, Passegue E.  
695 2015. Functionally Distinct Subsets of Lineage-Biased Multipotent Progenitors Control Blood  
696 Production in Normal and Regenerative Conditions. *Cell Stem Cell* **17**: 35-46.
- 697 Roux PP, Shahbazian D, Vu H, Holz MK, Cohen MS, Taunton J, Sonenberg N, Blenis J. 2007. RAS/ERK  
698 signaling promotes site-specific ribosomal protein S6 phosphorylation via RSK and stimulates cap-  
699 dependent translation. *J Biol Chem* **282**: 14056-14064.
- 700 Roux PP, Topisirovic I. 2018. Signaling Pathways Involved in the Regulation of mRNA Translation. *Mol Cell*  
701 *Biol* **38**.
- 702 Schalm SS, Fingar DC, Sabatini DM, Blenis J. 2003. TOS motif-mediated raptor binding regulates 4E-BP1  
703 multisite phosphorylation and function. *Current biology : CB* **13**: 797-806.
- 704 Schneider RK, Schenone M, Ferreira MV, Kramann R, Joyce CE, Hartigan C, Beier F, Brummendorf TH,  
705 Germing U, Platzbecker U et al. 2016. Rps14 haploinsufficiency causes a block in erythroid  
706 differentiation mediated by S100A8 and S100A9. *Nat Med* **22**: 288-297.
- 707 Signer RA, Magee JA, Salic A, Morrison SJ. 2014. Haematopoietic stem cells require a highly regulated  
708 protein synthesis rate. *Nature* **509**: 49-54.
- 709 Sigurdsson V, Miharada K. 2018. Regulation of unfolded protein response in hematopoietic stem cells. *Int*  
710 *J Hematol* **107**: 627-633.
- 711 Socolovsky M, Nam H-S, Fleming MD, Haase VH, Brugnara C, Lodish HF. 2001. Ineffective erythropoiesis  
712 in Stat5a-/-5b-/- mice due to decreased survival of early erythroblasts. *Blood* **98**: 3261-3273.
- 713 Sugiyama D, Inoue-Yokoo T, Fraser ST, Kulkeaw K, Mizuochi C, Horio Y. 2011. Embryonic regulation of the  
714 mouse hematopoietic niche. *ScientificWorldJournal* **11**: 1770-1780.
- 715 Terzian T, Dumble M, Arbab F, Thaller C, Donehower LA, Lozano G, Justice MJ, Roop DR, Box NF. 2011.  
716 Rpl27a mutation in the sooty foot ataxia mouse phenocopies high p53 mouse models. *The Journal*  
717 *of Pathology* **224**: 540-552.
- 718 Ulirsch JC, Verboon JM, Kazerounian S, Guo MH, Yuan D, Ludwig LS, Handsaker RE, Abdulhay NJ, Fiorini C,  
719 Genovese G et al. 2018. The Genetic Landscape of Diamond-Blackfan Anemia. *Am J Hum Genet*  
720 **103**: 930-947.
- 721 Watkins-Chow DE, Cooke J, Pidsley R, Edwards A, Slotkin R, Leeds KE, Mullen R, Baxter LL, Campbell TG,  
722 Salzer MC et al. 2013. Mutation of the diamond-blackfan anemia gene Rps7 in mouse results in  
723 morphological and neuroanatomical phenotypes. *PLoS Genet* **9**: e1003094.
- 724 Wek RC, Jiang HY, Anthony TG. 2006. Coping with stress: eIF2 kinases and translational control. *Biochem*  
725 *Soc Trans* **34**: 7-11.
- 726 Wilson DN, Doudna Cate JH. 2012. The structure and function of the eukaryotic ribosome. *Cold Spring*  
727 *Harb Perspect Biol* **4**.
- 728 Yilmaz OH, Valdez R, Theisen BK, Guo W, Ferguson DO, Wu H, Morrison SJ. 2006. Pten dependence  
729 distinguishes haematopoietic stem cells from leukaemia-initiating cells. *Nature* **441**: 475-482.
- 730 Yonath A, Franceschi F. 1998. Functional universality and evolutionary diversity: insights from the  
731 structure of the ribosome. *Structure* **6**: 679-684.

732

**Figure 4. Heterozygous loss of *RpS12* impairs HSCs ability to reconstitute peripheral blood.**

**(A)** Non-competitive BM transplant strategy testing the long-term reconstituting activity of *RpS12*<sup>KO/+</sup> HSCs. 10<sup>6</sup> bone marrow cells from *RpS12*<sup>KO/+</sup> or *RpS12*<sup>flox/flox</sup> samples (CD45.2+) were transplanted into lethally irradiated B6.SJL (CD45.1+) mice, peripheral blood chimerism was determined every 4 weeks. **(B)** Kaplan-Meier survival curves of mice transplanted with BM cells from *RpS12*<sup>KO/+</sup> and control *RpS12*<sup>flox/+</sup> or *RpS12*<sup>flox/flox</sup> mice (control n=20 and KO/+ n=20 transplanted mice, combination of 2 independent non-competitive transplants with 1 donor per genotype transplanted into 10 host mice each). **(C)** Frequency of recipient mice with long-term (20-weeks) multi-lineage reconstitution (≥0.5% in all three macrophages, B, and T cells)(control n=20 and KO/+ n=20 transplanted mice, combination of 2 independent non-competitive transplants). **(D-G)** Peripheral blood donor derived **(D)** total chimerism and **(E-G)** multi-lineage chimerism in non-competitively transplanted whole bone marrow (CD45.2+) recipients (flox/flox n=10 and KO/+ n=10). **(H)** Schematic representation of the competitive bone marrow transplant. 5x10<sup>5</sup> cells from *RpS12*<sup>KO/+</sup> or *RpS12*<sup>flox/+</sup> donor bone marrow (CD45.2+) mixed with 5x10<sup>5</sup> competitor bone marrow cells from B6.SJL (CD45.1+) mice were injected into lethally irradiated B6.SJL (CD45.1+) mice. Chimerism in peripheral blood was determined every 4 weeks and bone marrow chimerism was analyzed at 20 weeks after transplant. **(I)** Total bone marrow chimerism and **(J)** HSCs donor-derived (CD45.2+) chimerism in the recipient bone marrow (Flox/+ n=10 and KO/+ n=10 competitive-transplanted mice). **(K-N)** Donor derived peripheral blood chimerism of competitively transplanted *RpS12*<sup>KO/+</sup> or *RpS12*<sup>flox/+</sup> bone marrow cells as described in **H**.

Non-competitive transplants were performed twice, using different controls: *RpS12*<sup>flox/+</sup> or *RpS12*<sup>flox/flox</sup>. The competitive transplant was performed once, using *RpS12*<sup>flox/+</sup> mice as a control group

Statistical analysis: data represent mean +/-SEM, unpaired t-tests were performed to assess significance among populations between genotypes \*p < 0.05, \*\*p < 0.01, \*\*\*p < 0.001, \*\*\*\*p < 0.0001

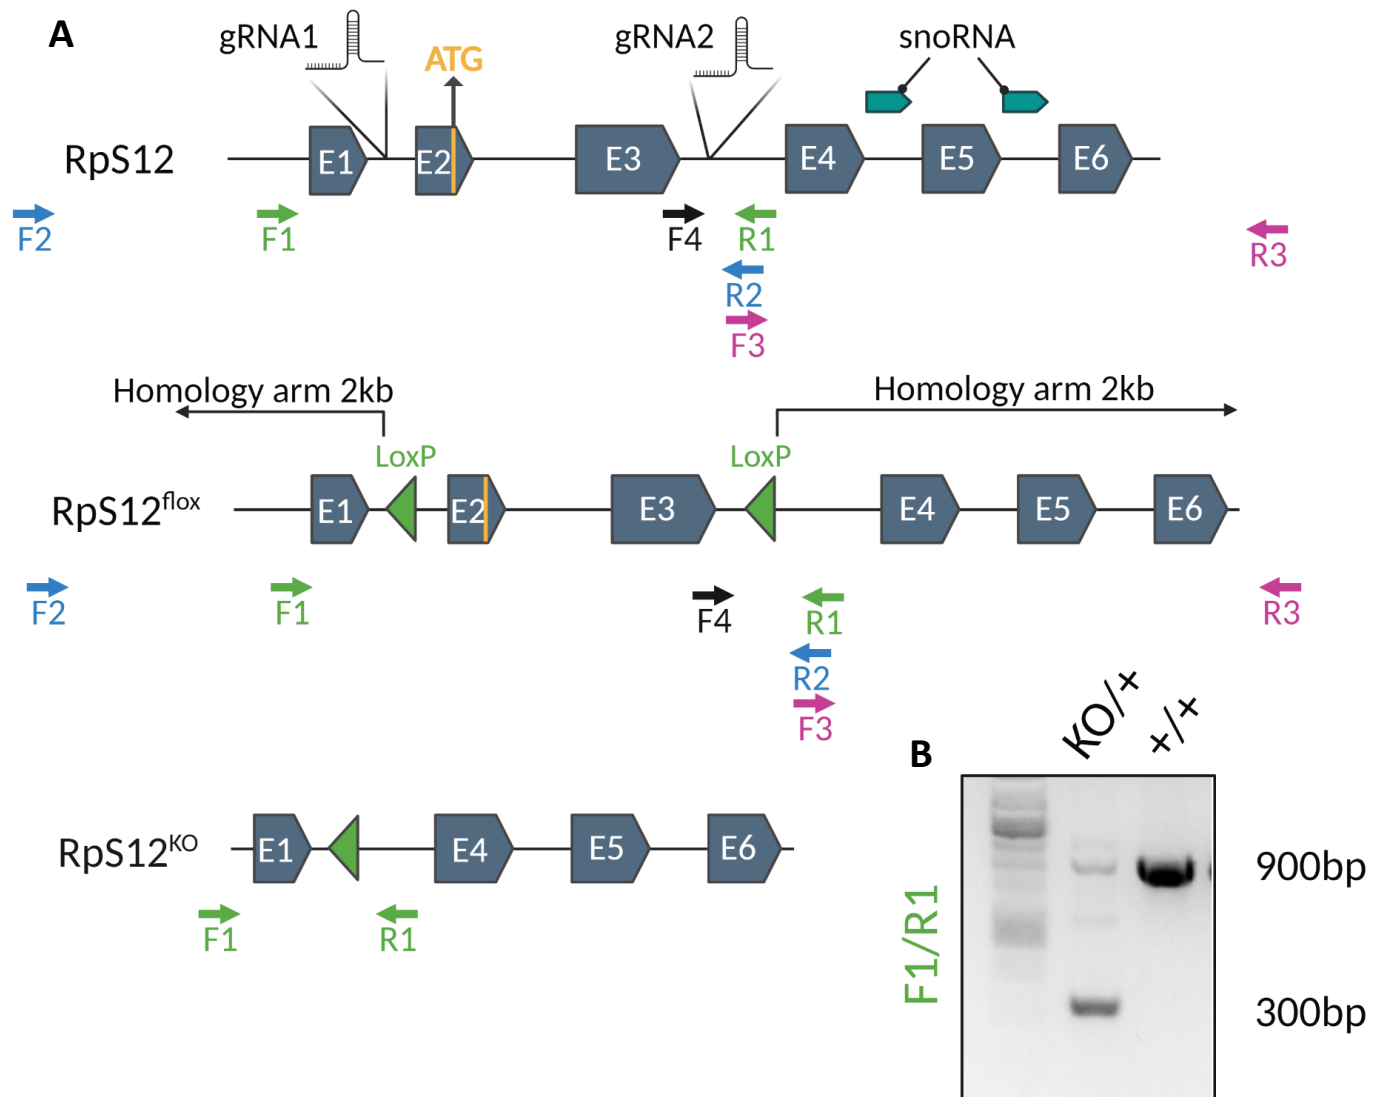

**Supplementary Figure 1. CRISPR gene editing and genotyping strategy for the generation of *RpS12<sup>Flox</sup>* and *RpS12<sup>KO</sup>***

**(A)** Diagram of the WT, Flox and KO alleles of RpS12 generated in this study indicating the position of Snord100 and Snora33 (snoRNA), Cas9 gRNAs target locations, and primers used for genotyping. The homology arms starting sites are indicated and the ends fall outside of the RpS12 locus. To identify the first transformants, two pair of primers were used for PCR amplification: F2/R2 and F3/R3. F2 and R3 fall outside of the sequence covered by the homology arms, to ensure the inserts are on the correct location. The presence of LoxP sites was confirmed by Sanger sequencing using primers F1 and F4 for F2/R2 fragments, and with F3 and R3 for F3/R3 fragments. To determine excision of exon 2 and 3 by Cre recombination primers F1 and R1 were used, which generate a 900bp fragment in *RpS12<sup>+</sup>* and a 300bp fragment in *RpS12<sup>KO</sup>* **(B)**.

### Supplementary table 1

| Oligo Name | Sequence                |
|------------|-------------------------|
| gRNA 1     | CGCAGTAGACACGCTATCGCCGG |
| gRNA 2     | GTGGGTTGCTGTGTGGATCGGGG |
| F1         | GCACATGCGCACAGAAGT      |
| R1         | CGGACTATCTATCCCCACGA    |
| F2         | GTACAGCTATCTGCCAGGAA    |
| R2         | CGAGGTCGACGGTATCG       |
| F3         | CGATACCGTCGACCTCG       |
| R3         | GTGCTAGCAACAGAAGGTTC    |
| F4         | GTCTCAATACTGTGGGGTGT    |

**Supplementary Table 2**

|                                          |                                      | Antibodies                             | Clone                                | Source         | Catalog Number |             |          |
|------------------------------------------|--------------------------------------|----------------------------------------|--------------------------------------|----------------|----------------|-------------|----------|
| <b>Peripheral blood flow</b>             |                                      |                                        |                                      |                |                |             |          |
| <b>Peripheral blood after Transplant</b> |                                      | CD16/CD32                              | Clone 2.4G2                          | BD biosciences | 553142         |             |          |
|                                          |                                      | Gr1 APC Cy7                            | RB6-8C5                              | BD biosciences | 557661         |             |          |
|                                          |                                      | Mac1 PE                                | M1/70                                | BioLegend      | 101208         |             |          |
|                                          |                                      | B220 A700                              | RA3-6B2                              | BD biosciences | 557957         |             |          |
|                                          |                                      | Thy1.2 APC                             | 53-2.1                               | BD biosciences | 553007         |             |          |
|                                          |                                      | CD45.1 FITC                            | A20                                  | BD Biosciences | 553775         |             |          |
|                                          |                                      | CD45.2 PE/Dazzle                       | 104                                  | BioLegend      | 109845         |             |          |
| <b>Bone marrow flow on live cells</b>    |                                      |                                        |                                      |                |                |             |          |
| <b>Bone marrow after Transplant</b>      | <b>Biotinylated lineage cocktail</b> | CD3e                                   | 145-2C11                             | eBioscience    | 13003182       |             |          |
|                                          |                                      | CD4                                    | GK1.5                                | eBioscience    | 13004182       |             |          |
|                                          |                                      | CD8a                                   | 53-6.7                               | eBioscience    | 13008182       |             |          |
|                                          |                                      | Gr.1                                   | RB68C5                               | eBioscience    | 13593182       |             |          |
|                                          |                                      | B220                                   | RA3-6B2                              | eBioscience    | 13045282       |             |          |
|                                          |                                      | CD19                                   | MB 19-1                              | eBioscience    | 13019182       |             |          |
|                                          |                                      | Ter119                                 | TER119                               | eBioscience    | 13592182       |             |          |
|                                          | <b>Conjugated</b>                    | Sca1 PE-Cy7                            | D7                                   | BioLegend      | 108114         |             |          |
|                                          |                                      | cKit APC                               | 2B8                                  | BD Biosciences | 553356         |             |          |
|                                          |                                      | FCRg PE                                | 93                                   | Thermofisher   | 12-0161-81     |             |          |
|                                          |                                      | CD34e eF450                            | RAM34                                | Thermofisher   | 48-0341-80     |             |          |
|                                          |                                      | CD150 BV421                            | Q38-480                              | BD Biosciences | 562811         |             |          |
|                                          |                                      | CD48 Alx700                            | HM48-1                               | BD Biosciences | 560731         |             |          |
|                                          |                                      | Flk2-PE-Cy5                            | A2F10                                | BioLegend      | 135312         |             |          |
|                                          |                                      | CD45.2 BV605                           | 104                                  | BioLegend      | 109841         |             |          |
|                                          |                                      | CD45.1 FITC                            | A20                                  | BD Biosciences | 553775         |             |          |
|                                          |                                      | IL7R PerCP Cy5.5                       | SB/199                               | BD Biosciences | 560733         |             |          |
|                                          |                                      | Streptavidin-APC-Cy7                   |                                      | BD Biosciences | 554063         |             |          |
|                                          |                                      | <b>Bone marrow flow on fixed cells</b> |                                      |                |                |             |          |
|                                          |                                      | <b>Before fixation</b>                 | <b>Biotinylated lineage cocktail</b> | CD3e           | 145-2C11       | eBioscience | 13003182 |
| CD4                                      | GK1.5                                |                                        |                                      | eBioscience    | 13004182       |             |          |
| CD8a                                     | 53-6.7                               |                                        |                                      | eBioscience    | 13008182       |             |          |
| Gr.1                                     | RB68C5                               |                                        |                                      | eBioscience    | 13593182       |             |          |
| B220                                     | RA3-6B2                              |                                        |                                      | eBioscience    | 13045282       |             |          |
| CD19                                     | MB 19-1                              |                                        |                                      | eBioscience    | 13019182       |             |          |
| Ter119                                   | TER-119                              |                                        |                                      | eBioscience    | 13592182       |             |          |
| <b>Conjugated</b>                        | Sca1 PE-Cy7                          |                                        | D7                                   | eBioscience    | 25598182       |             |          |
|                                          | cKit APC                             |                                        | 2B8                                  | BD Biosciences | 553356         |             |          |
|                                          | CD150 BV421                          |                                        | Q38-480                              | BD Biosciences | 562811         |             |          |
|                                          | CD48 Alx700                          |                                        | HM48-1                               | BD Biosciences | 560731         |             |          |
|                                          | Flk2-PE                              |                                        | A2F10                                | BioLegend      | 135310         |             |          |
|                                          | IL7R PerCP-Cy5                       |                                        | A7R34                                | BioLegend      | 135021         |             |          |
|                                          | Streptavidin-APC-Cy7                 |                                        |                                      | BD Biosciences | 554063         |             |          |
| <b>Post fixation</b>                     | <b>Apoptosis</b>                     | Annexin V                              |                                      | BD Biosciences | 560931         |             |          |
|                                          |                                      | PI                                     |                                      | BD Biosciences | 556463         |             |          |
|                                          | <b>p-Flow</b>                        | pS6 (Ser235/236) Alexa 488             | D57.2.2E                             | Cell Signaling | 4803S          |             |          |
|                                          |                                      | pERK1(T202/Y204) Alexa 488             | E10                                  | Cell Signaling | 4374           |             |          |
|                                          |                                      | pAkt (Ser473) AF647                    | 193H12                               | Cell Signaling | 2337           |             |          |
|                                          |                                      | p4E-BP1 (Thr37/46) AF647               | 236B4                                | Cell Signaling | 5123           |             |          |
|                                          | <b>Cell cycle</b>                    | Ki-67 FITC                             | B56                                  | BD Biosciences | 556026         |             |          |
| Hoechst                                  |                                      |                                        | BD Biosciences                       |                |                |             |          |



**Supplementary Table 3**

|                        | <b>Antibodies</b>                         | <b>Clone</b>   | <b>Source</b>  | <b>Catalog Number</b> |            |
|------------------------|-------------------------------------------|----------------|----------------|-----------------------|------------|
|                        | <b>Bone marrow flow OPP</b>               |                |                |                       |            |
| <b>Before fixation</b> | <b>Biotinylated lineage cocktail</b>      | CD3e           | 145-2C11       | eBioscience           | 13003182   |
|                        |                                           | CD4            | GK1.5          | eBioscience           | 13004182   |
|                        |                                           | CD8a           | 53-6.7         | eBioscience           | 13008182   |
|                        |                                           | Gr.1           | RB68C5         | eBioscience           | 13593182   |
|                        |                                           | B220           | RA3-6B2        | eBioscience           | 13045282   |
|                        |                                           | CD19           | MB 19-1        | eBioscience           | 13019182   |
|                        |                                           | Ter119         | TER-119        | eBioscience           | 13592182   |
|                        |                                           | IL7R           | eBioRDR5       | eBioscience           | 13127882   |
|                        | <b>Conjugated</b>                         | Sca1 PE-Cy7    | D7             | eBioscience           | 25598182   |
|                        |                                           | cKit APC       | 2B8            | BD Biosciences        | 553356     |
|                        |                                           | FCRg PE        | 93             | Thermofisher          | 12-0161-81 |
|                        |                                           | CD34e eF450    | RAM34          | Thermofisher          | 48-0341-80 |
|                        |                                           | CD150 BV421    | Q38-480        | BD Biosciences        | 562811     |
|                        |                                           | CD48 Alx700    | HM48-1         | BD Biosciences        | 560731     |
|                        |                                           | Flk2-PE Cy5    | A2F10          | BioLegend             | 135311     |
|                        |                                           | IL7R PerCP-Cy5 | A7R34          | BioLegend             | 135021     |
|                        | Streptavidin-APC-Cy7                      |                | BD Biosciences | 554063                |            |
| <b>Non Conjugated</b>  | OPP                                       |                | Thermofisher   | C10456                |            |
| <b>After</b>           | Click-IT 488                              |                | Thermofisher   | C10456                |            |
|                        | <b>Bone marrow and spleen (non-lysed)</b> |                |                |                       |            |
|                        | CD16/CD32                                 | Clone 2.4G2    | BD biosciences | 553142                |            |
|                        | Ter119 APC                                | TER119         | BioLegend      | 116211                |            |
|                        | CD71 PE                                   | C2             | BD biosciences | 561937                |            |
